# Supplementary material for: Brevianamides and Mycophenolic Acid Derivatives from the Deep-Sea-Derived Fungus Penicillium brevicompactum DFFSCS025
Source: Mar Drugs. 2017 Feb 17;15(2):43. doi: 10.3390/md15020043 (PMC5334623; doi:10.3390/md15020043)
Supplement: Supplementary file 1 [file marinedrugs-15-00043-s001.pdf]

## Supporting Information

### **Brevianamides and mycophenolic acid derivatives from the Deep-Sea-Derived Fungus *Penicillium brevicompactum* DFFSCS025**

**Xinya Xu,<sup>1</sup> Xiaoyong Zhang,<sup>1</sup> Xuhua Nong,<sup>1</sup> Jie Wang<sup>1</sup>, and Shuhua Qi<sup>\*,1</sup>**

<sup>1</sup> Key Laboratory of Tropical Marine Bio-resources and Ecology, Guangdong Key Laboratory of Marine Materia Medica, RNAM Center for Marine Microbiology, South China Sea Institute of Oceanology, Chinese Academy of Sciences, 164 West Xingang Road, Guangzhou 510301 Guangdong, China; E-Mails: [xuxinya@scsio.ac.cn](mailto:xuxinya@scsio.ac.cn) (X.-Y.X.); [zhangxiaoyong@scsio.ac.cn](mailto:zhangxiaoyong@scsio.ac.cn) (X.-Y.Z.); [xhnong@scsio.ac.cn](mailto:xhnong@scsio.ac.cn) (X.-H.N.); [wangjielangjing@126.com](mailto:wangjielangjing@126.com) (J.W.); [shuhuaqi@scsio.ac.cn](mailto:shuhuaqi@scsio.ac.cn) (S.-H. Q)

\* Author to whom correspondence should be addressed; E-Mail: [shuhuaqi@scsio.ac.cn](mailto:shuhuaqi@scsio.ac.cn); Tel.: +86-20-8902-2112; Fax: +86-20-8445-8964.

## List of contents

Figure S1.  $^1\text{H}$  NMR spectrum for compound **1**.

Figure S2.  $^{13}\text{C}$  NMR spectrum for compound **1**.

Figure S3. HSQC spectrum for compound **1**.

Figure S4. HMBC spectrum for compound **1**.

Figure S5.  $^1\text{H}$ - $^1\text{H}$  COSY spectrum for compound **1**.

Figure S6. NOESY spectrum for compound **1**.

Figure S7. HR-ESIMS spectrum for compound **1**.

Figure S8.  $^1\text{H}$  NMR spectrum for compound **2**.

Figure S9.  $^{13}\text{C}$  NMR spectrum for compound **2**.

Figure S10. HSQC spectrum for compound **2**.

Figure S11. HMBC spectrum for compound **2**.

Figure S12. NOESY spectrum for compound **2**.

Figure S13. HR-ESIMS spectrum for compound **2**.

Figure S14.  $^1\text{H}$  NMR spectrum for compound **3**.

Figure S15.  $^{13}\text{C}$  NMR spectrum for compound **3**.

Figure S16. HSQC spectrum for compound **3**.

Figure S17. HMBC spectrum for compound **3**.

Figure S18. HR-ESIMS spectrum for compound **3**.

Figure S19.  $^1\text{H}$  NMR spectrum for compound **4**.

Figure S20.  $^{13}\text{C}$  NMR spectrum for compound **4**.

Figure S21. HSQC spectrum for compound **4**.

Figure S22. HMBC spectrum for compound **4**.

Figure S23. HR-ESIMS spectrum for compound **4**.

Figure S24.  $^1\text{H}$  NMR spectrum for compound **6**.

Figure S25.  $^{13}\text{C}$  NMR spectrum for compound **6**.

Figure S26. HSQC spectrum for compound **6**.

Figure S27. HMBC spectrum for compound **6**.

Figure S28. HR-ESIMS spectrum for compound **6**.

Figure S29. Original CD spectrum for compound **6**.

Figure S30.  $^1\text{H}$  NMR spectrum for compound **8**.

Figure S31.  $^{13}\text{C}$  NMR spectrum for compound **8**.

Figure S32. HMBC spectrum for compound **8**.

Figure S33. ESIMS spectrum for compound **8**.

Figure S34.  $^1\text{H}$  NMR spectrum for compound **9**.

Figure S35.  $^{13}\text{C}$  NMR spectrum for compound **9**.

Figure S36. HSQC spectrum for compound **9**.

Figure S37.  $^1\text{H}$ - $^1\text{H}$  COSY spectrum for compound **9**.

Figure S38. HMBC spectrum for compound **9**.

Figure S39. NOESY spectrum for compound **9**.

Figure S40. HR-ESIMS spectrum for compound **9**.

Figure S41. HPLC chromatogram for compounds **3**.

Figure S42. HPLC chromatogram for compound **5**.

Figure S43. Chiral HPLC chromatogram spectrum for compound **3**.

Figure S44. Chiral HPLC chromatogram spectrum for compound **6**.

Figure S1.  $^1\text{H}$  NMR spectrum for compound **1**

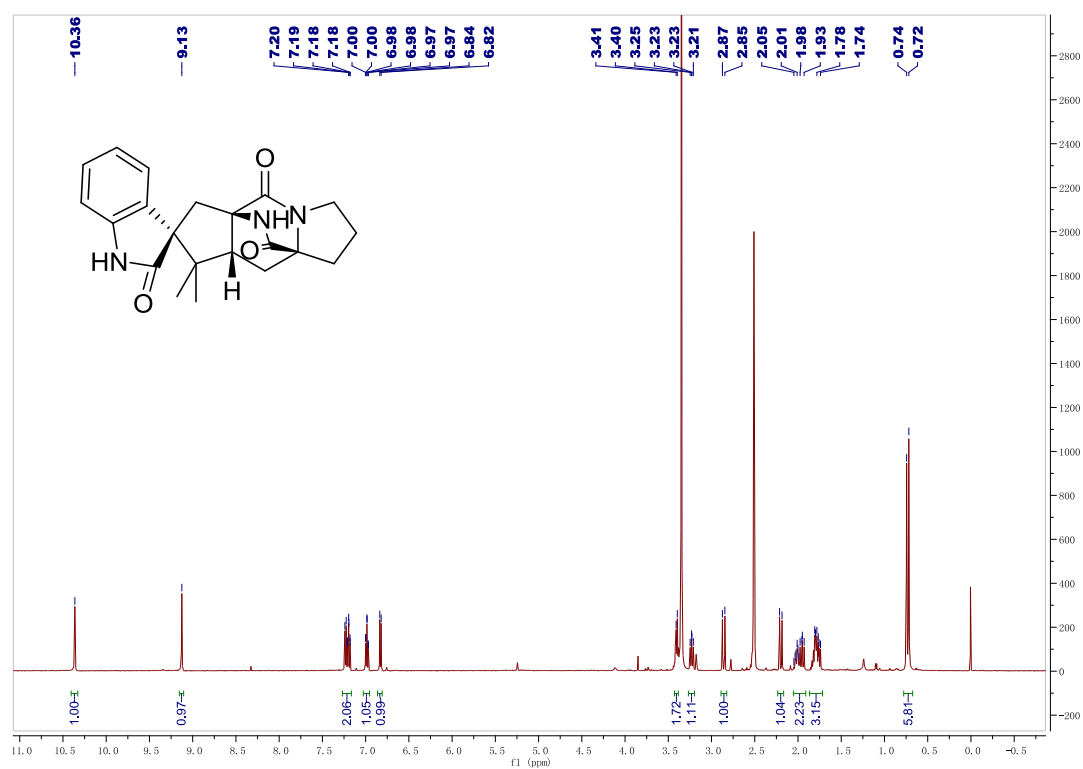

Figure S2.  $^{13}\text{C}$  NMR spectrum for compound **1**

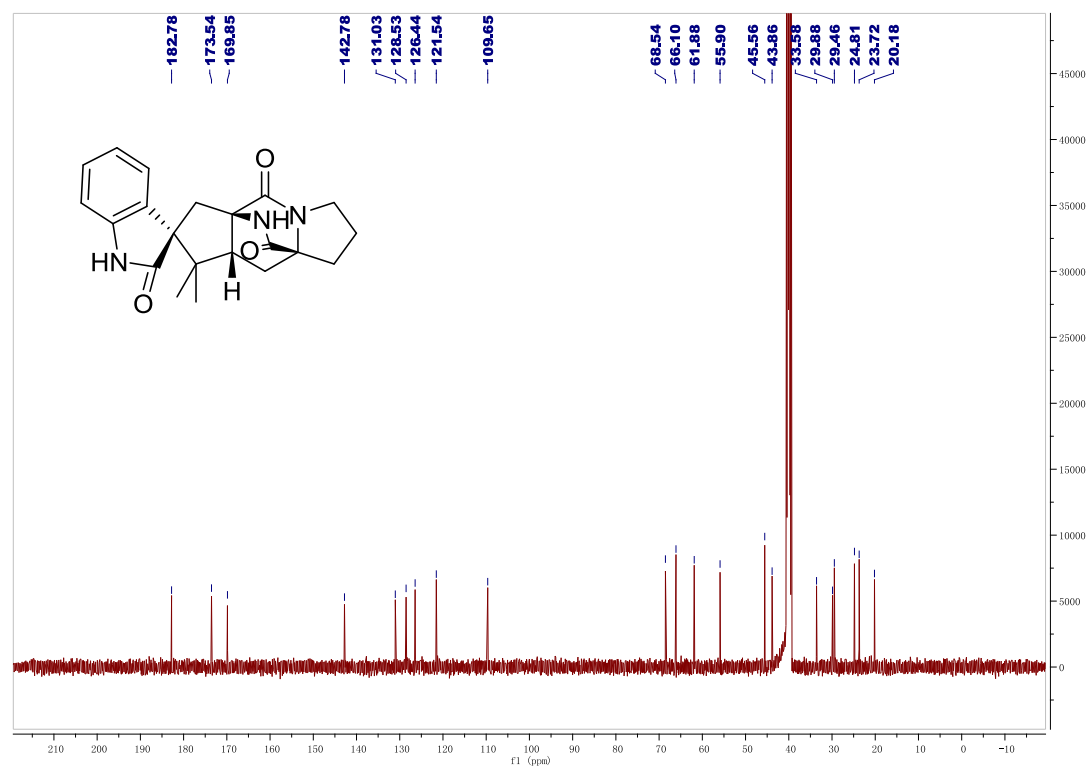

Figure S3. HSQC spectrum for compound **1**

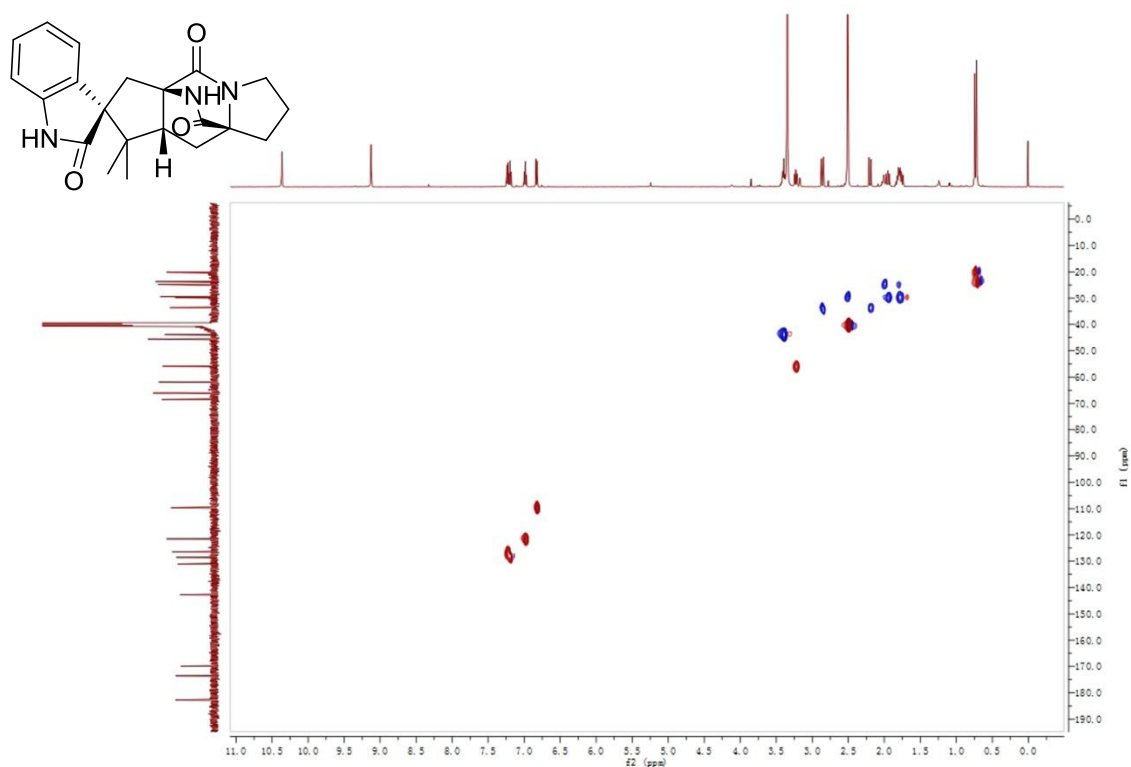

Figure S4. HMBC spectrum for compound **1**

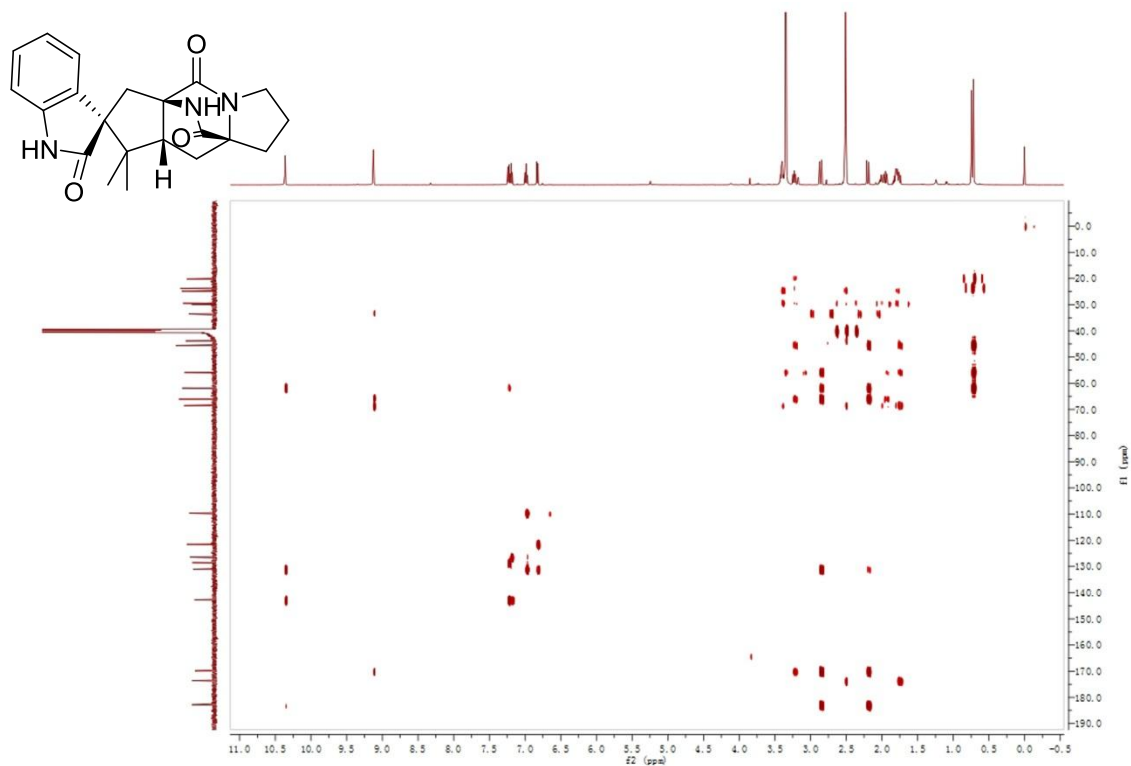

Figure S5.  $^1\text{H}$ - $^1\text{H}$  COSY spectrum for compound **1**

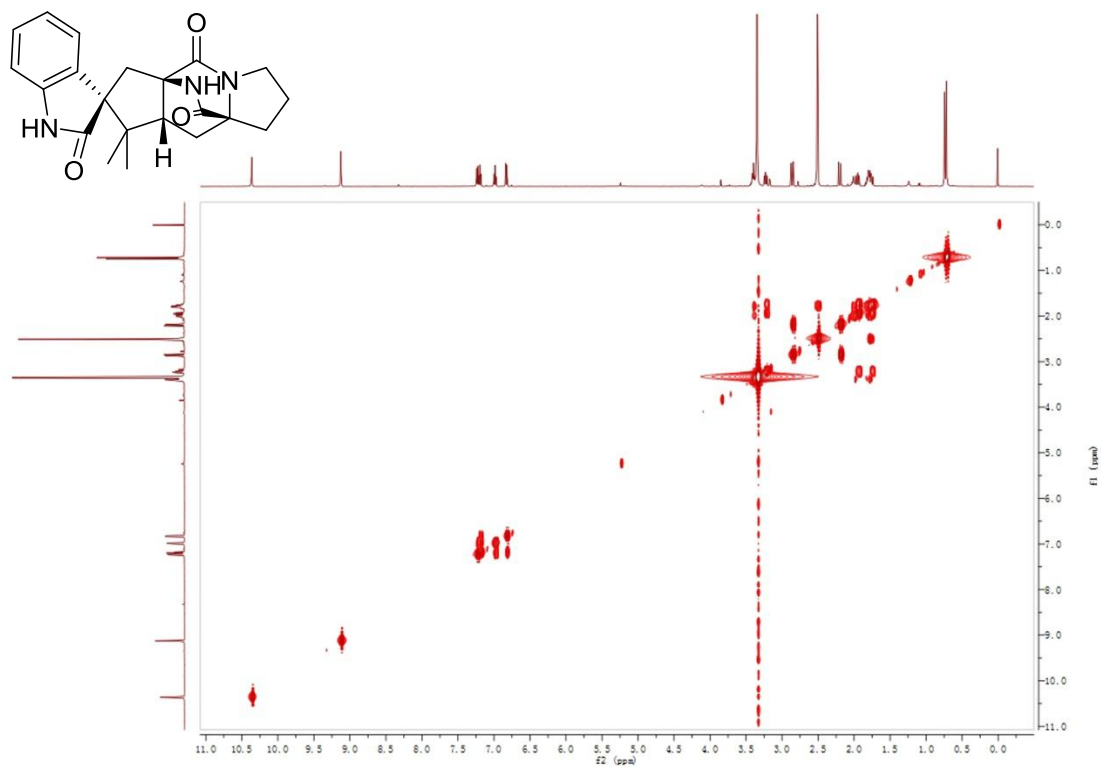

Figure S6. NOESY spectrum for compound **1**

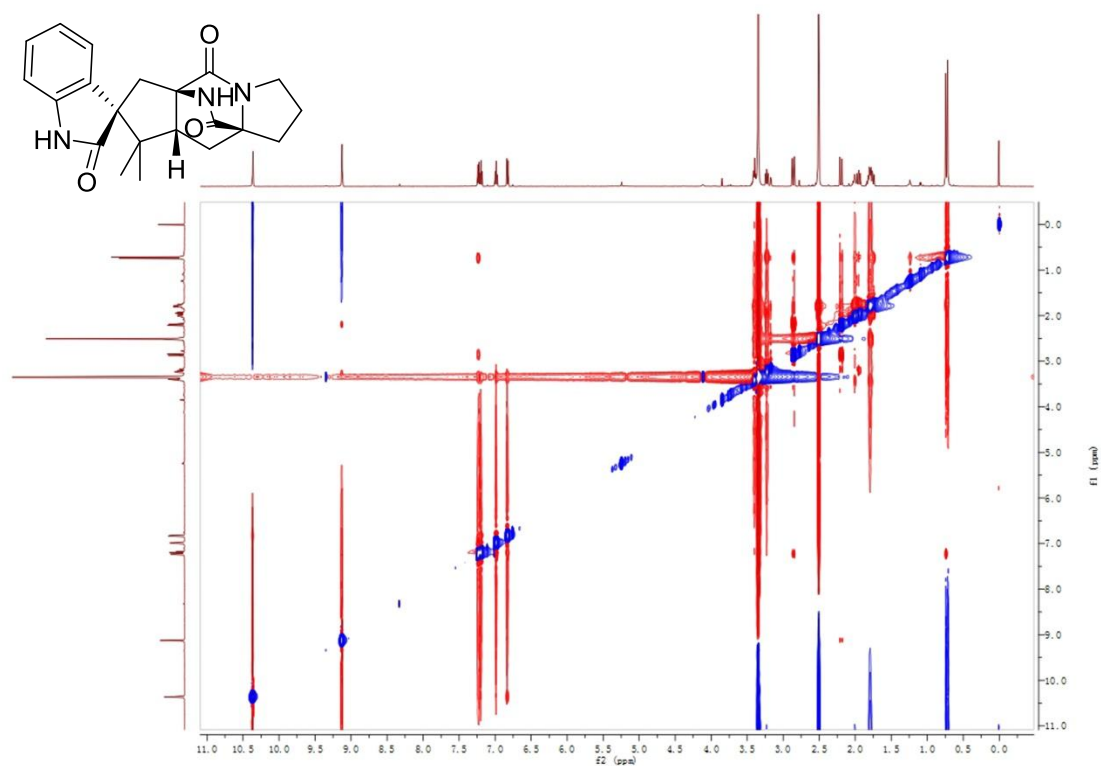

Figure S7. HR-ESIMS spectrum for compound 1

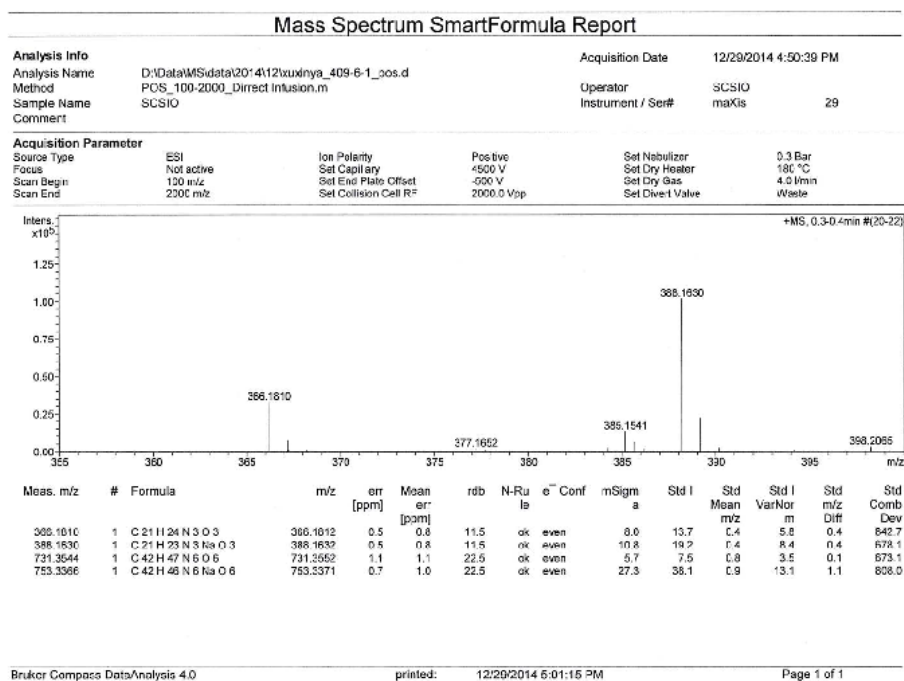

Figure S8. <sup>1</sup>H NMR spectrum for compound 2

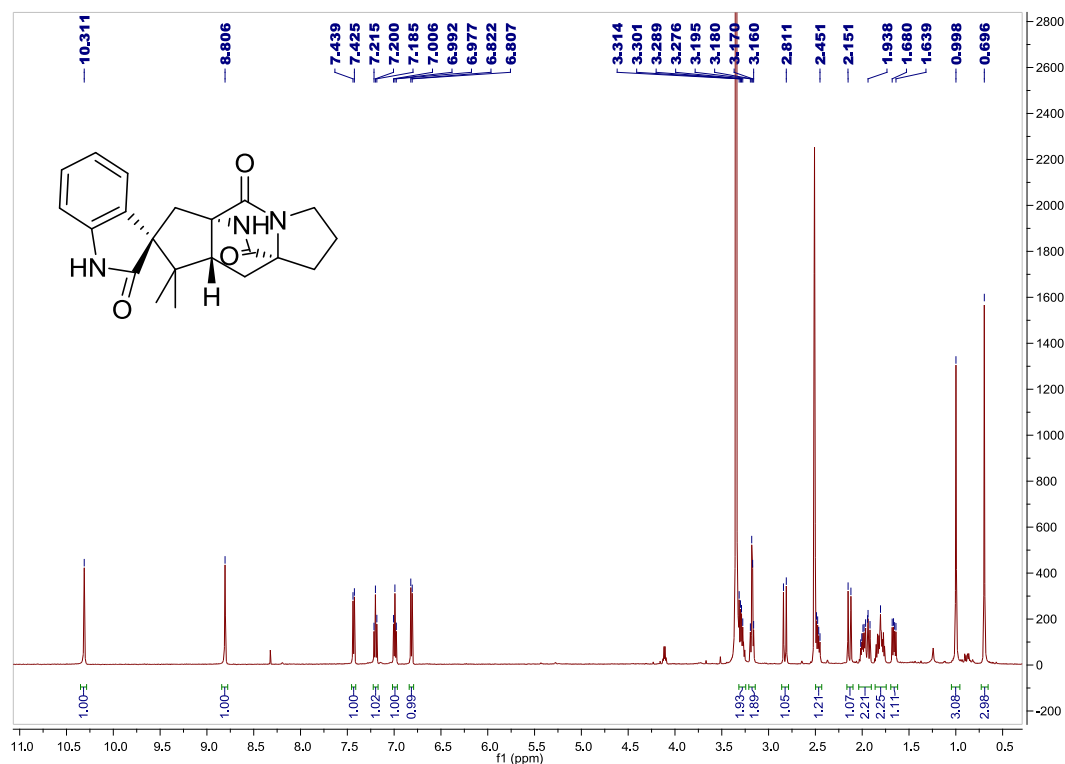

Figure S9.  $^{13}\text{C}$  NMR spectrum for compound **2**

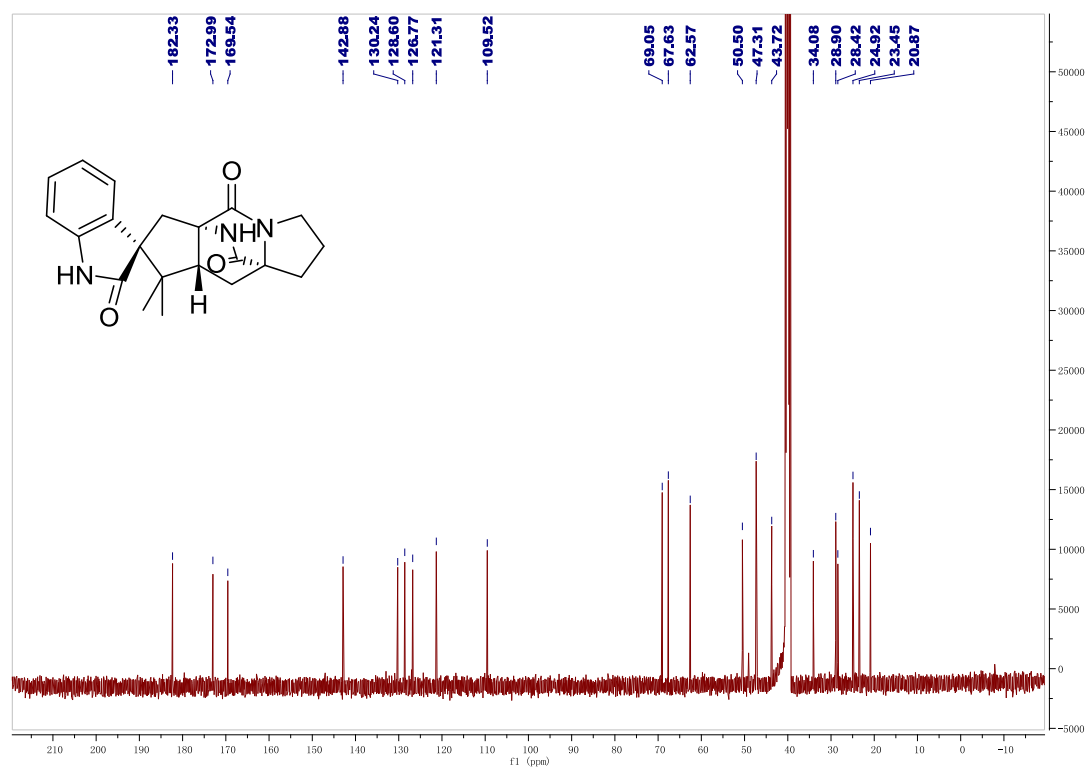

Figure S10. HSQC spectrum for compound **2**

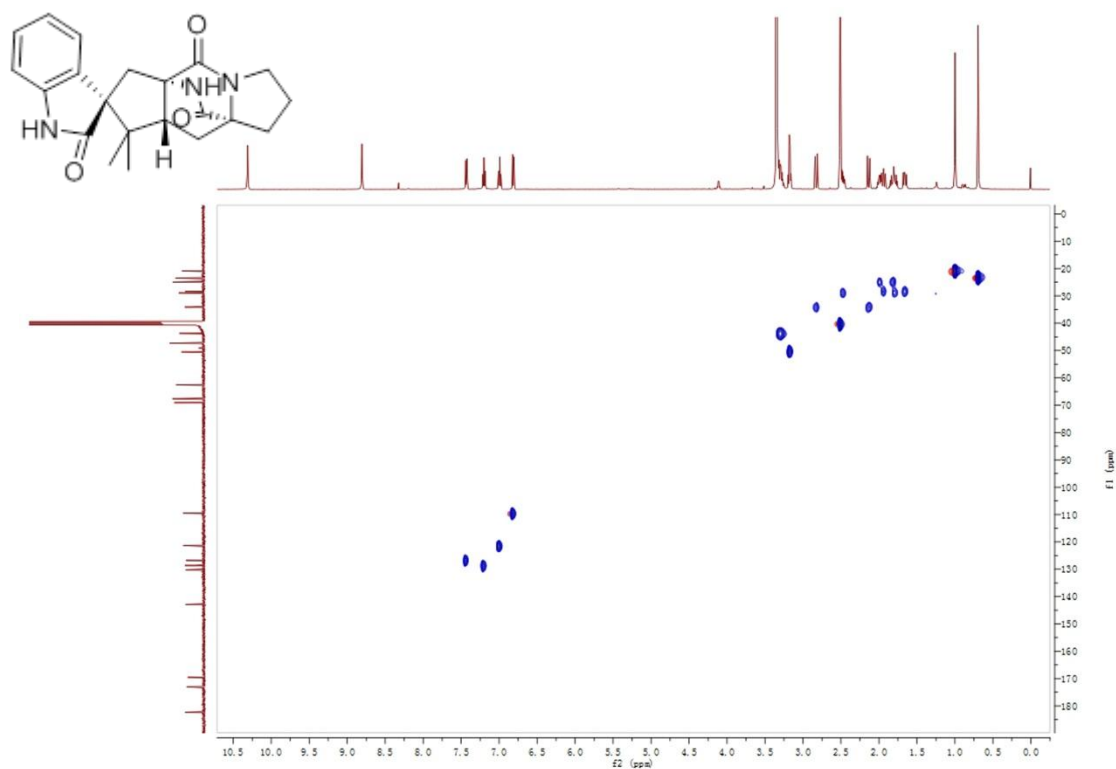

Figure S11. HMBC spectrum for compound **2**

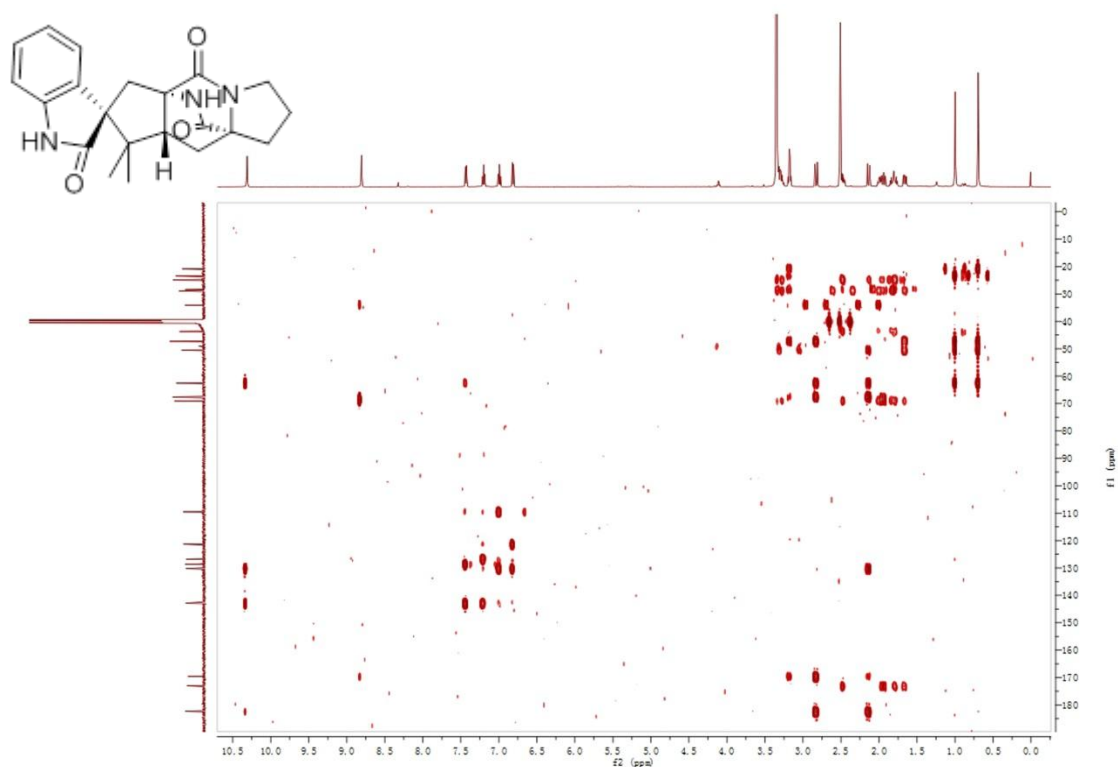

Figure S12. NOESY spectrum for compound **2**

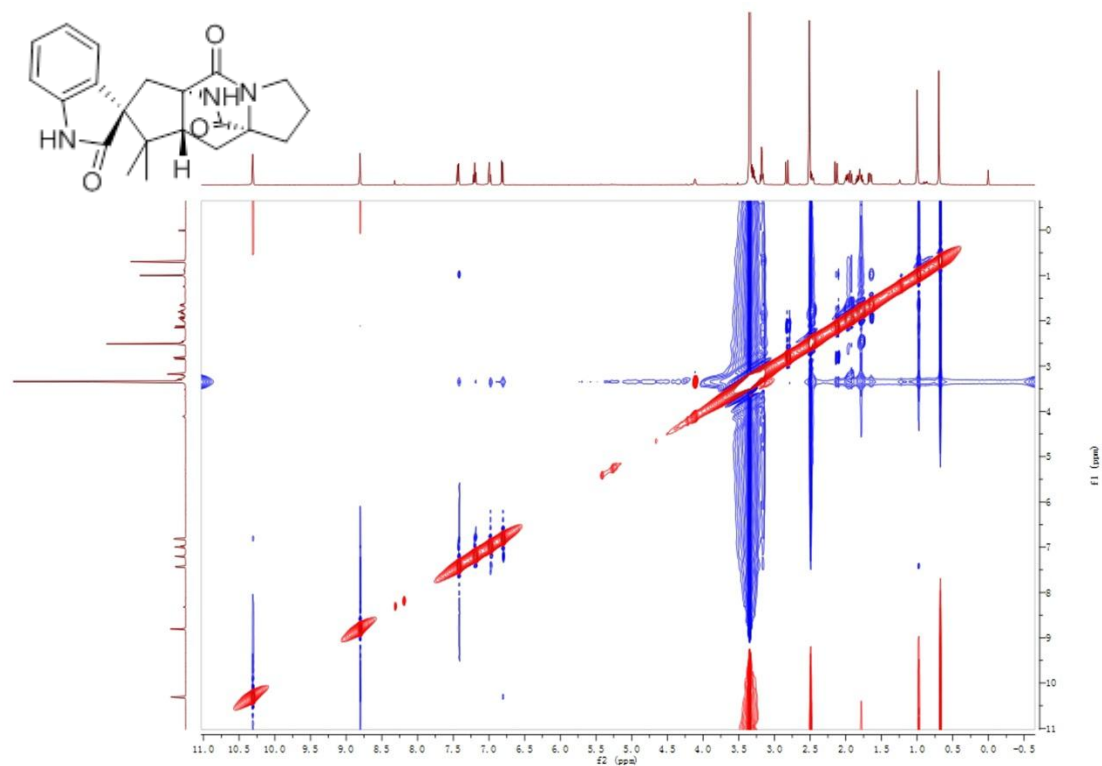

Figure S13. HR-ESIMS spectrum for compound 2

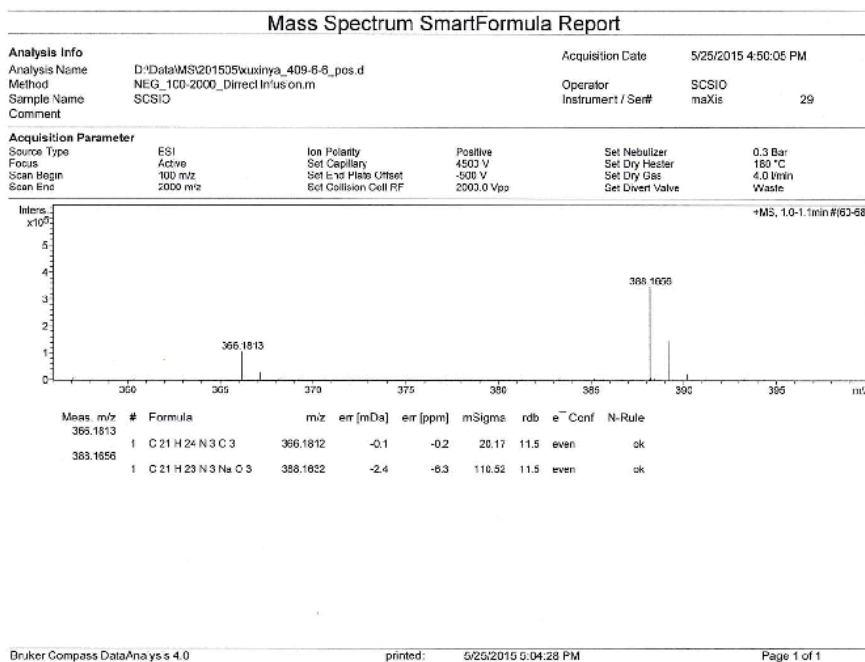

Figure S14. <sup>1</sup>H NMR spectrum for compound 3

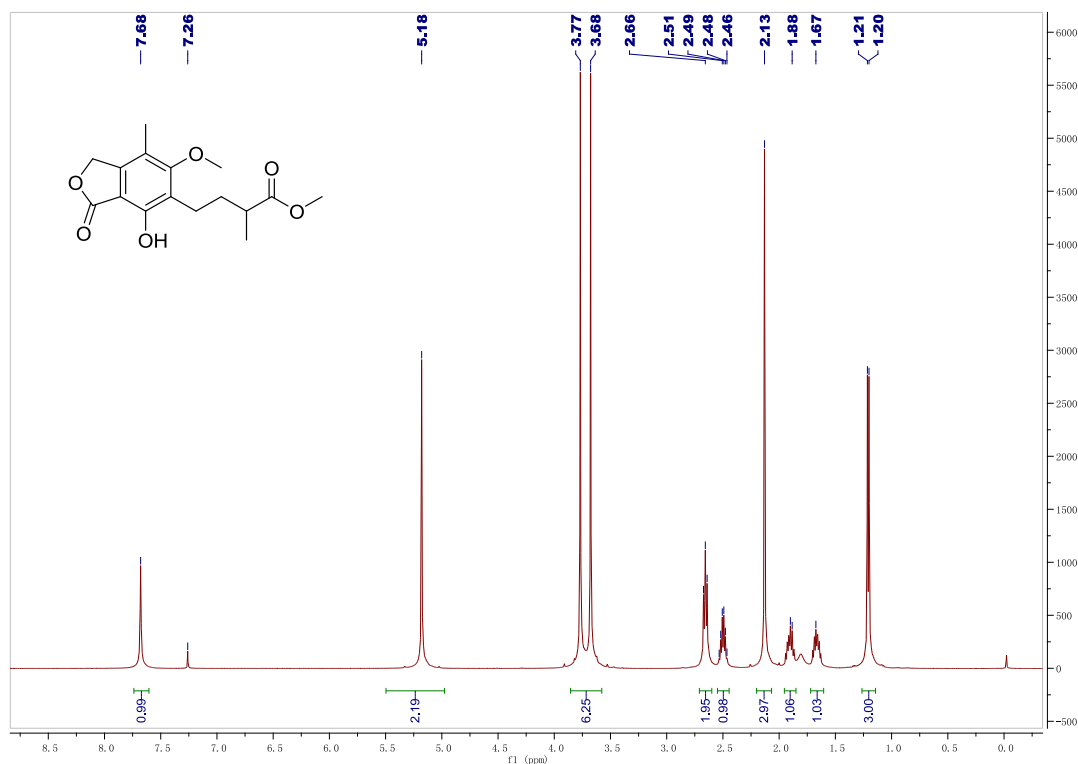

Figure S15.  $^{13}\text{C}$  NMR spectrum for compound **3**

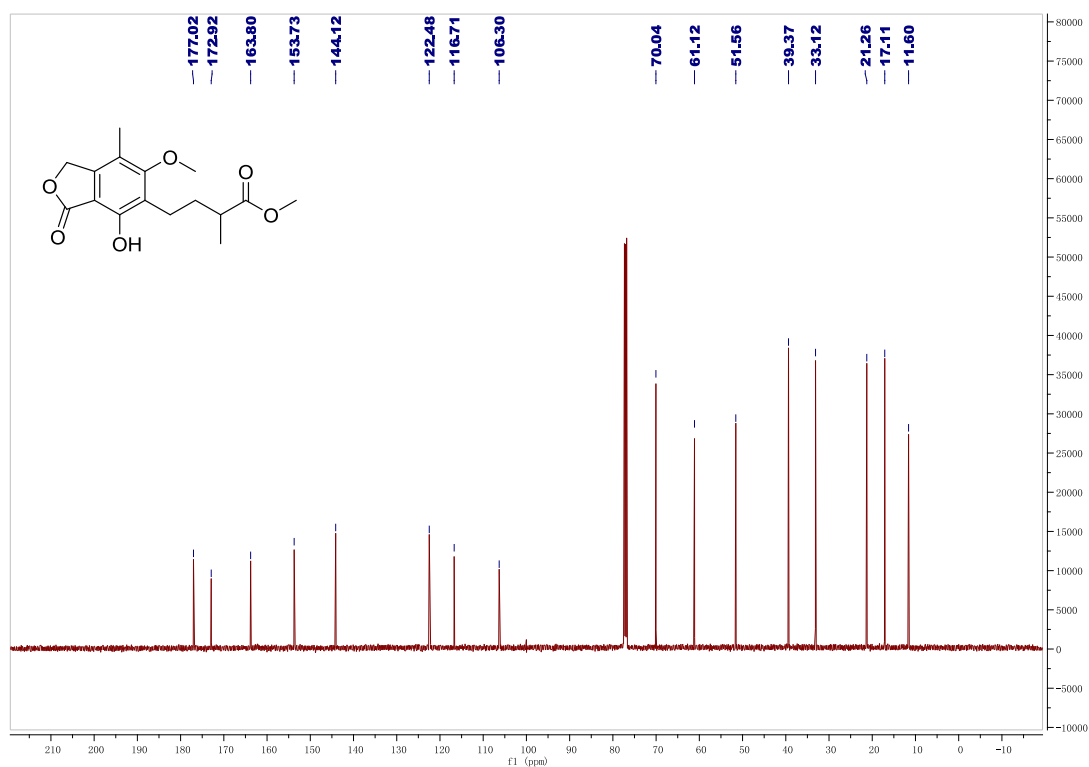

Figure S16. HSQC spectrum for compound **3**

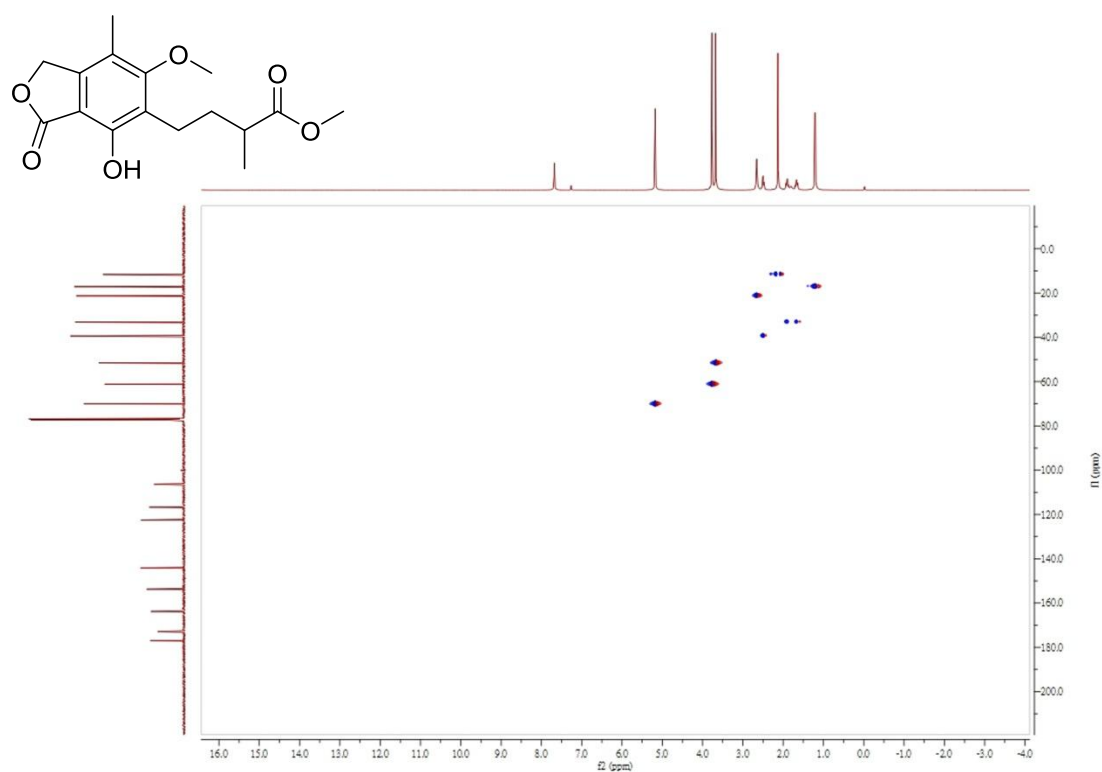

Figure S17. HMBC spectrum for compound **3**

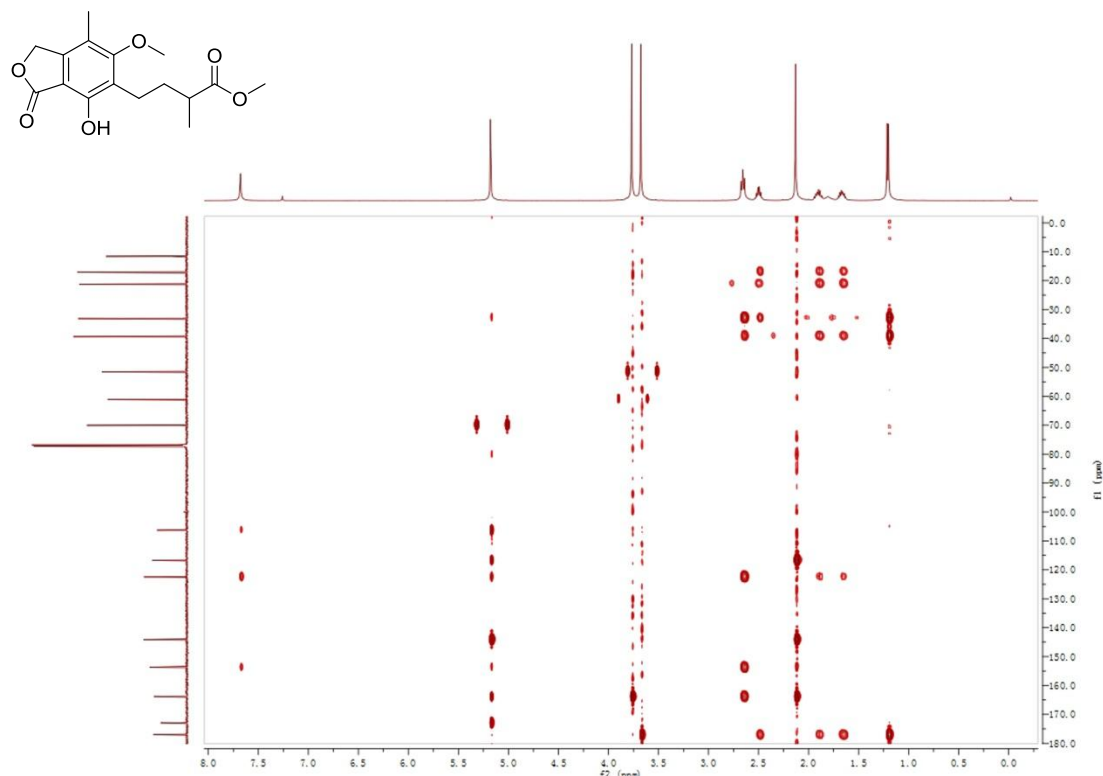

Figure S18. HR-ESIMS spectrum for compound **3**

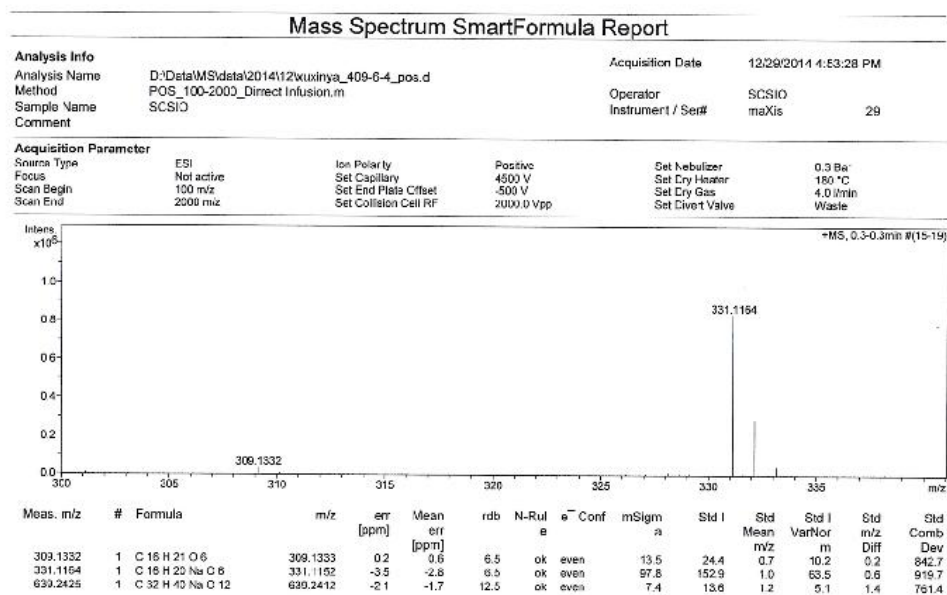

Figure S19.  $^1\text{H}$  NMR spectrum for compound **4**

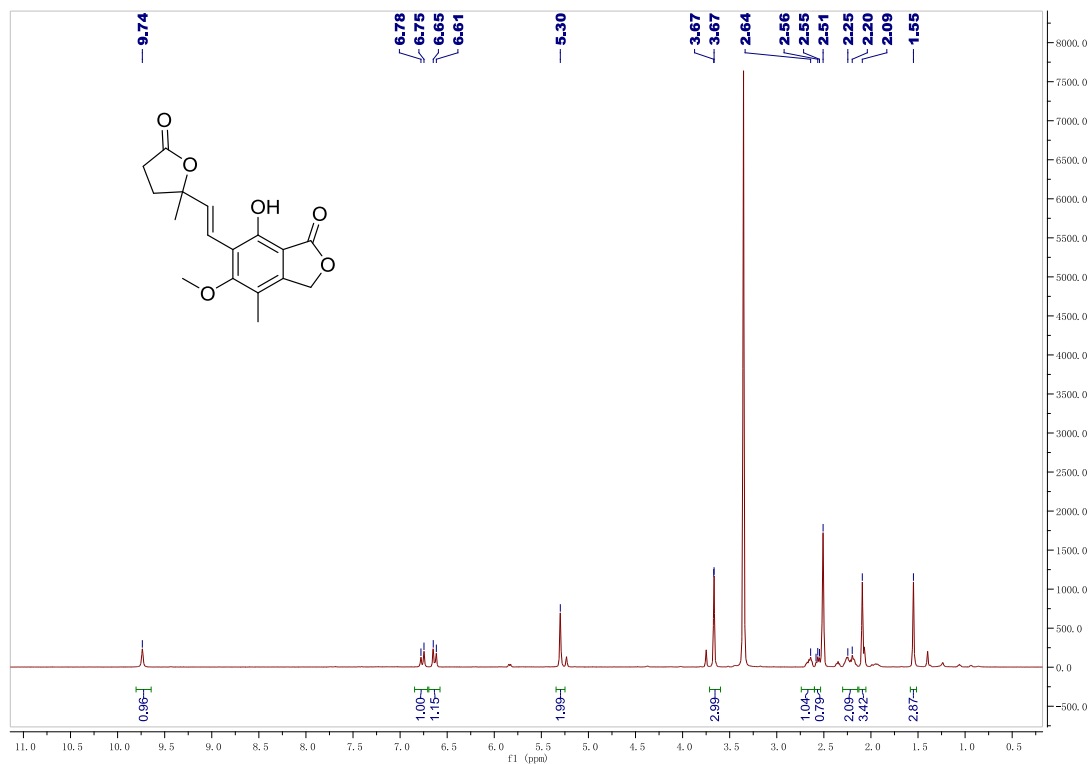

Figure S20.  $^{13}\text{C}$  NMR spectrum for compound **4**

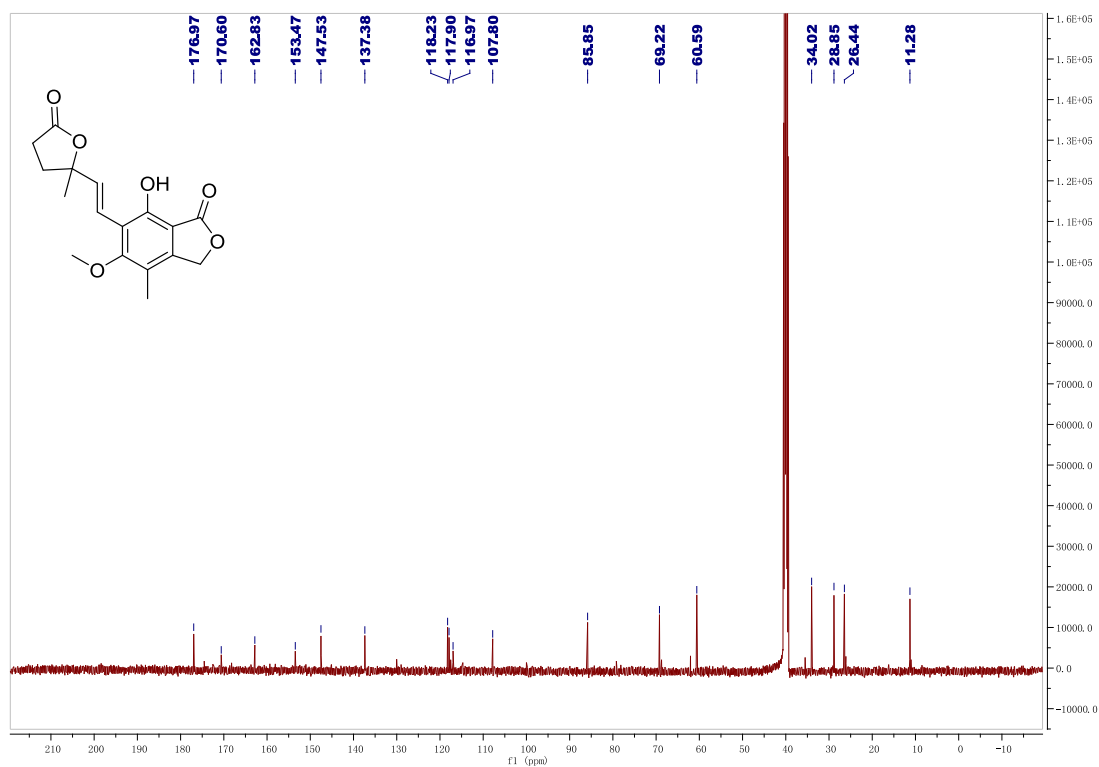

Figure S21. HSQC spectrum for compound **4**

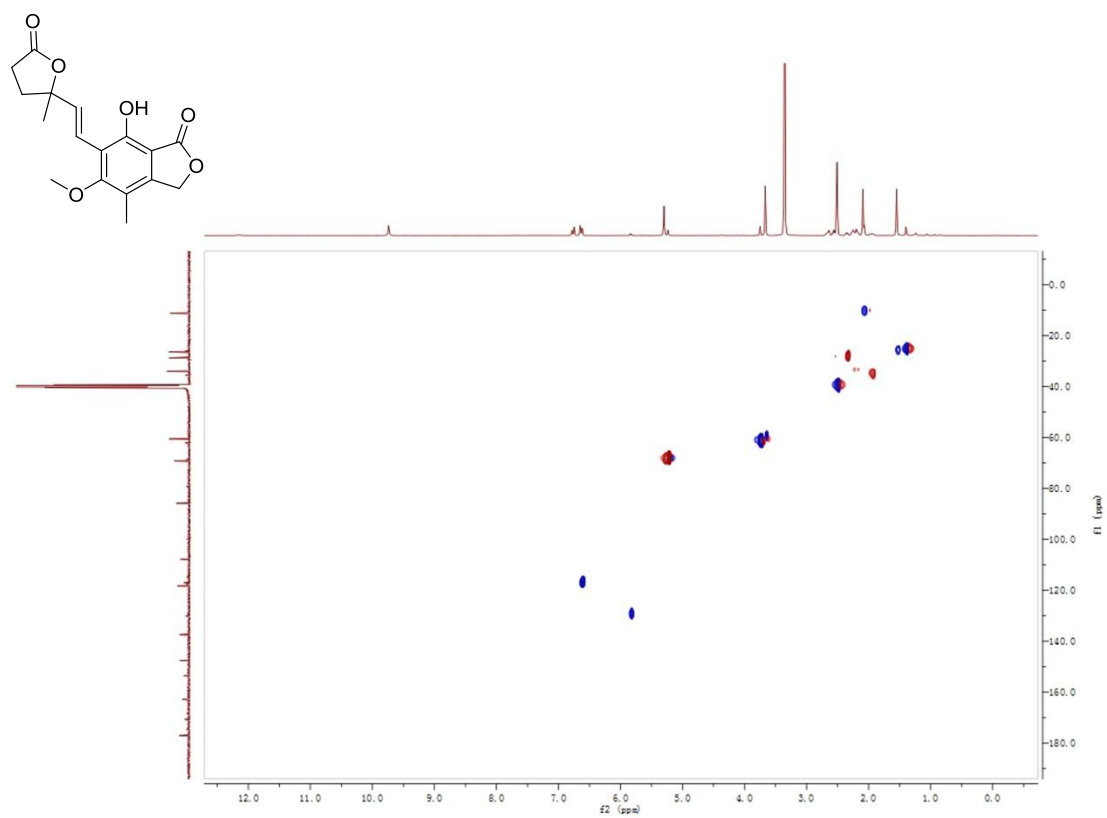

Figure S22. HMBC spectrum for compound **4**

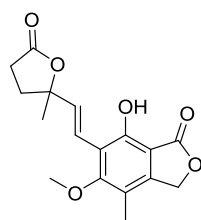

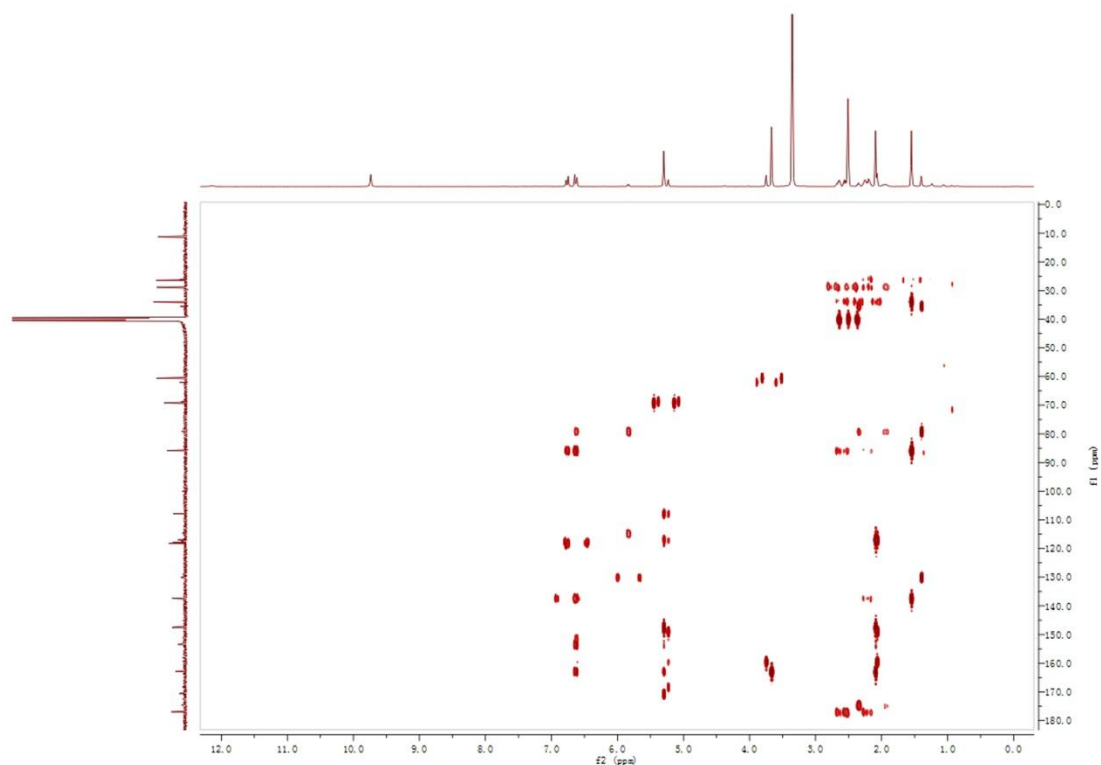

Figure S23. HR-ESIMS spectrum for compound 4

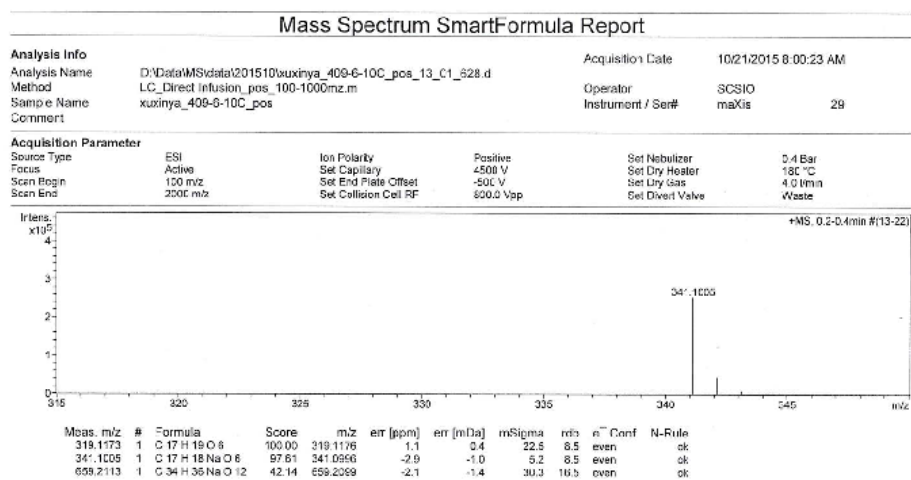

Figure S24. <sup>1</sup>H NMR spectrum for compound 6

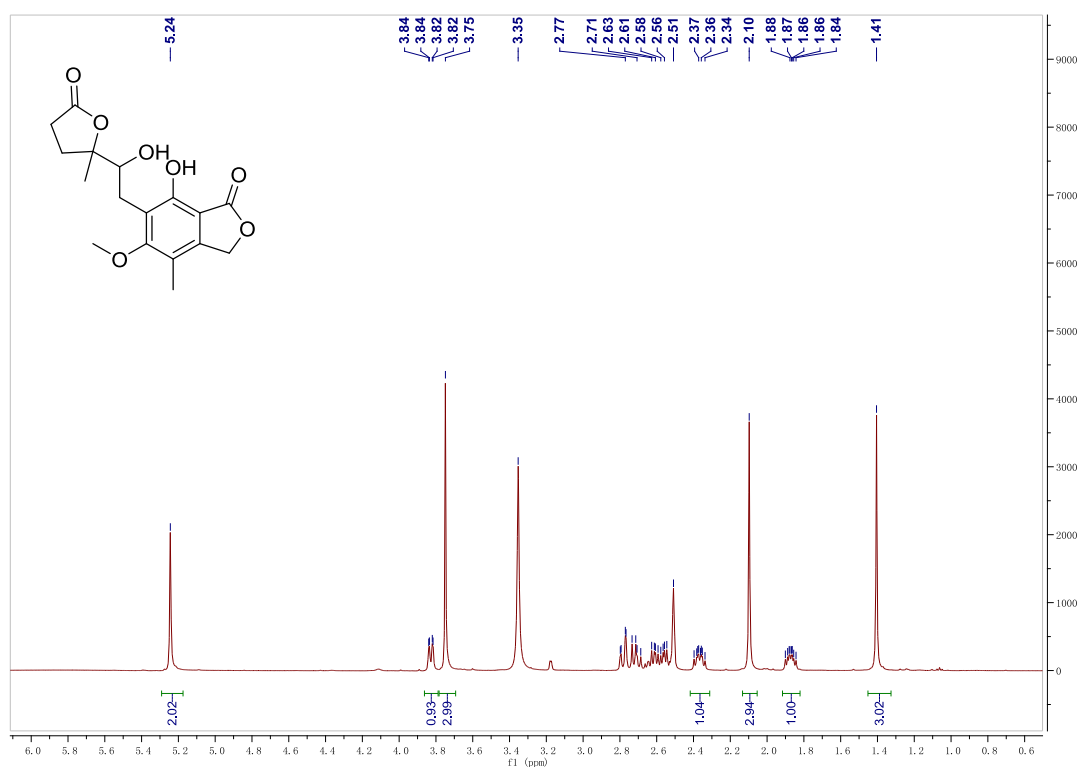

Figure S25. <sup>13</sup>C NMR spectrum for compound **6**

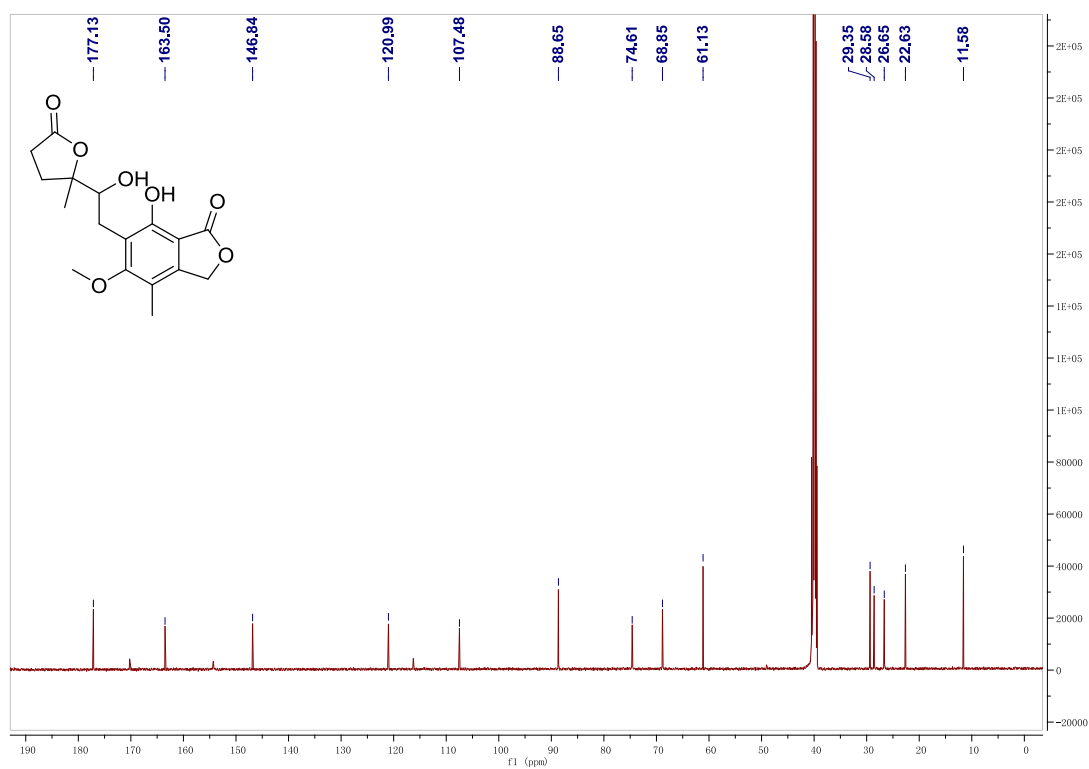

Figure S26. HSQC spectrum for compound **6**

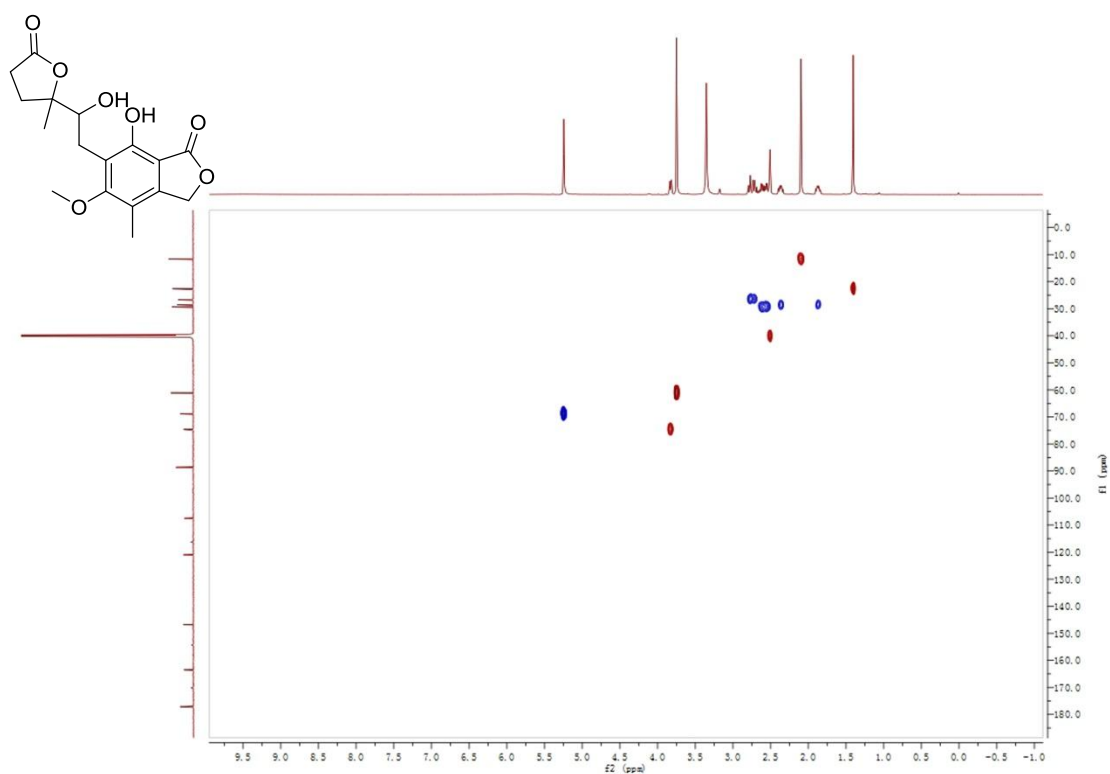

Figure S27. HMBC spectrum for compound **6**

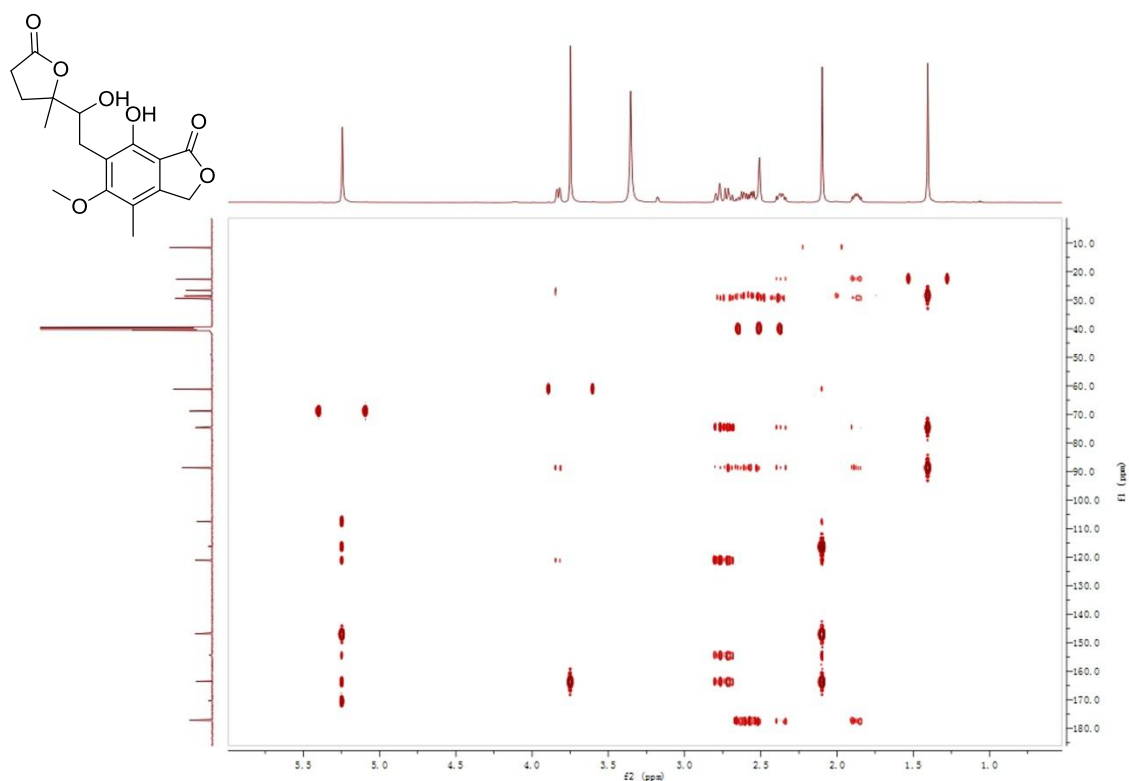

Figure S28. HR-ESIMS spectrum for compound **6**.

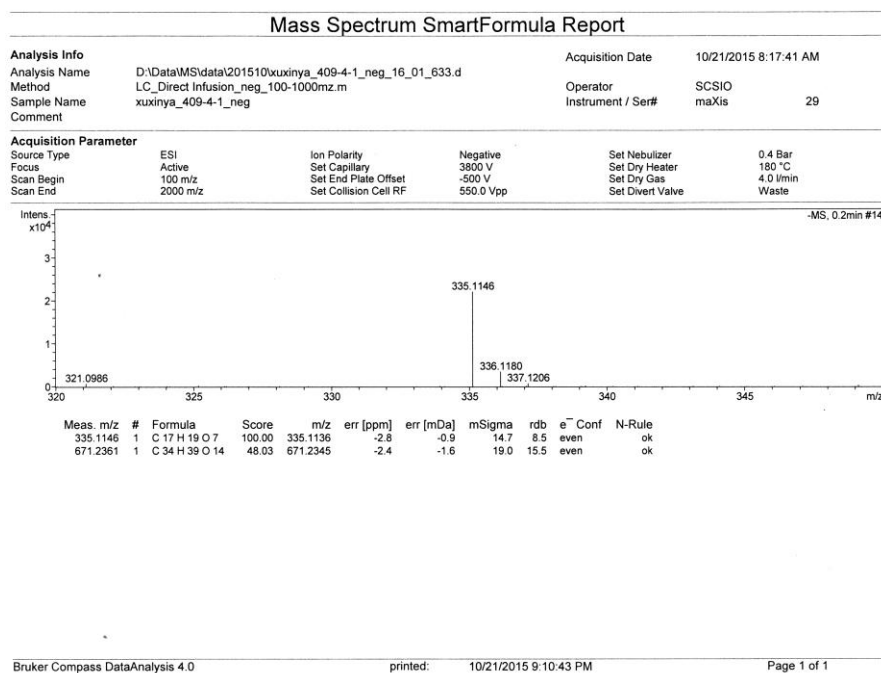

Figure S29. Original CD spectrum for compound 6 (MeOH, 200 µg/mL)

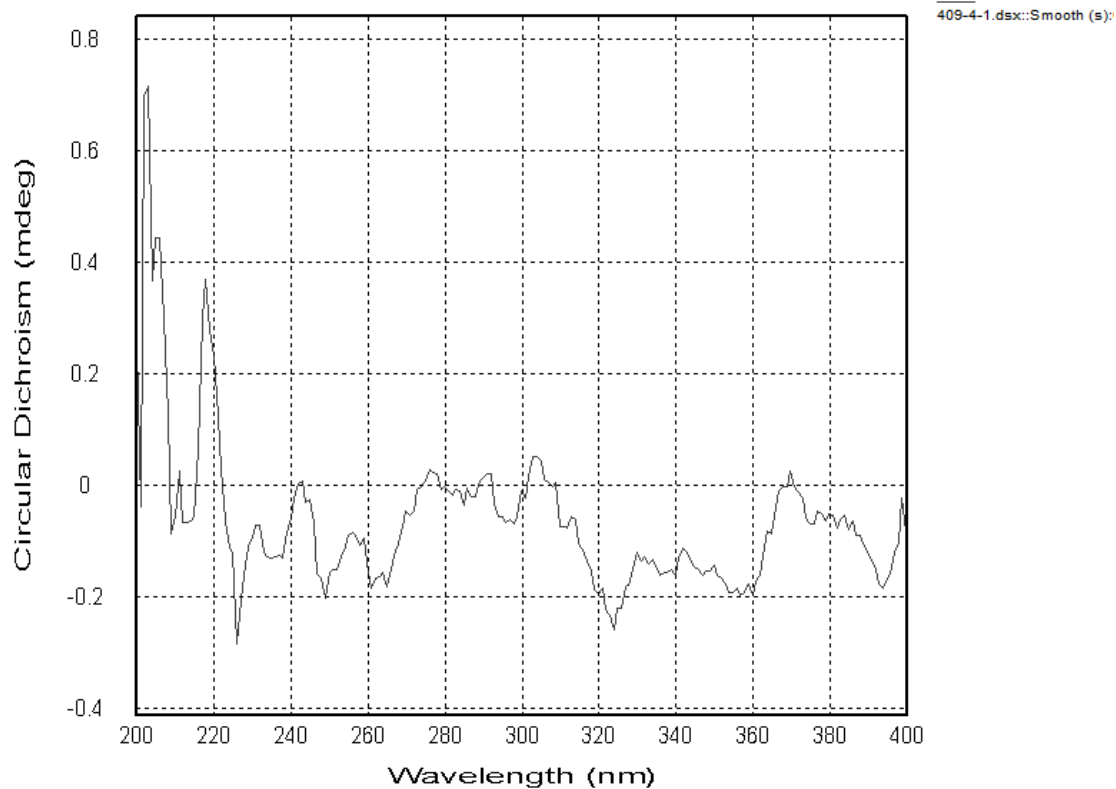

Figure S30. <sup>1</sup>H NMR spectrum for compound 8

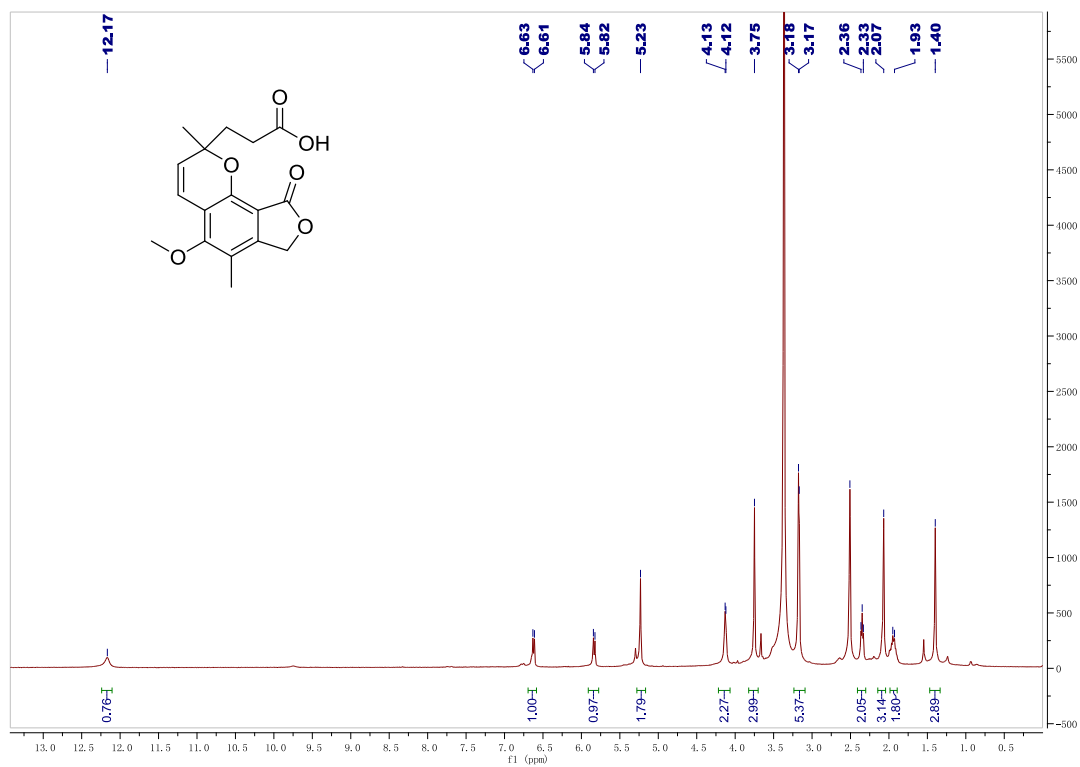

Figure S31. <sup>13</sup>C NMR spectrum for compound **8**

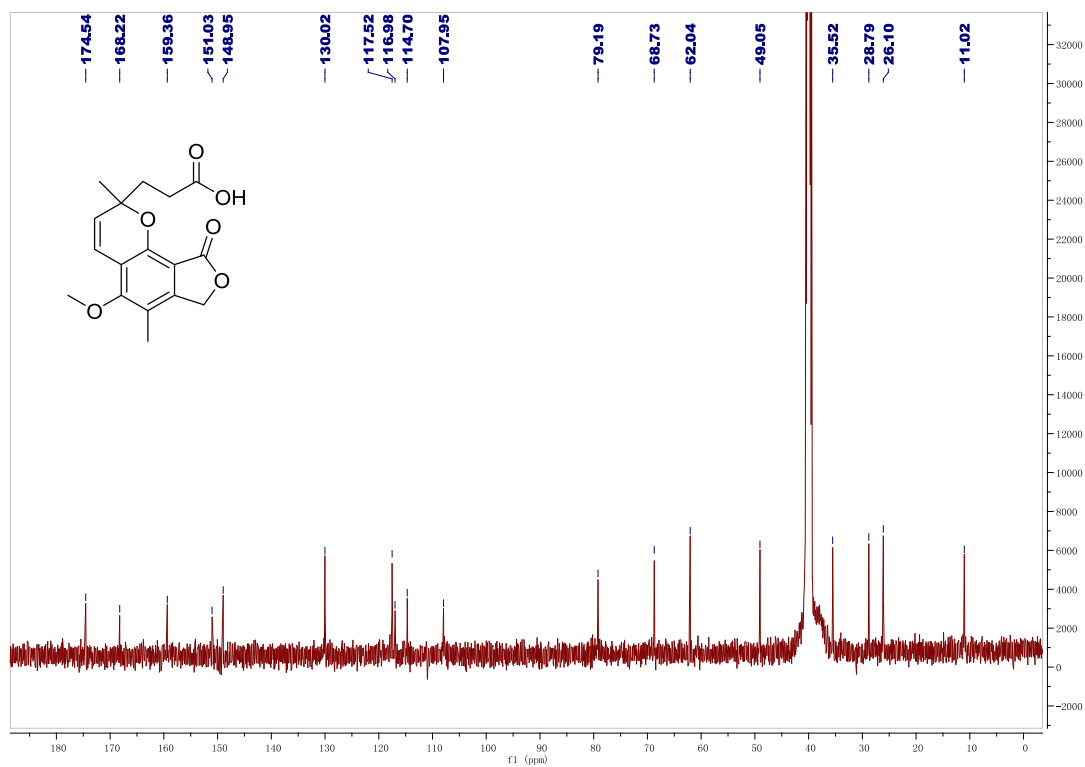

Figure S32. HMBC spectrum for compound **8**

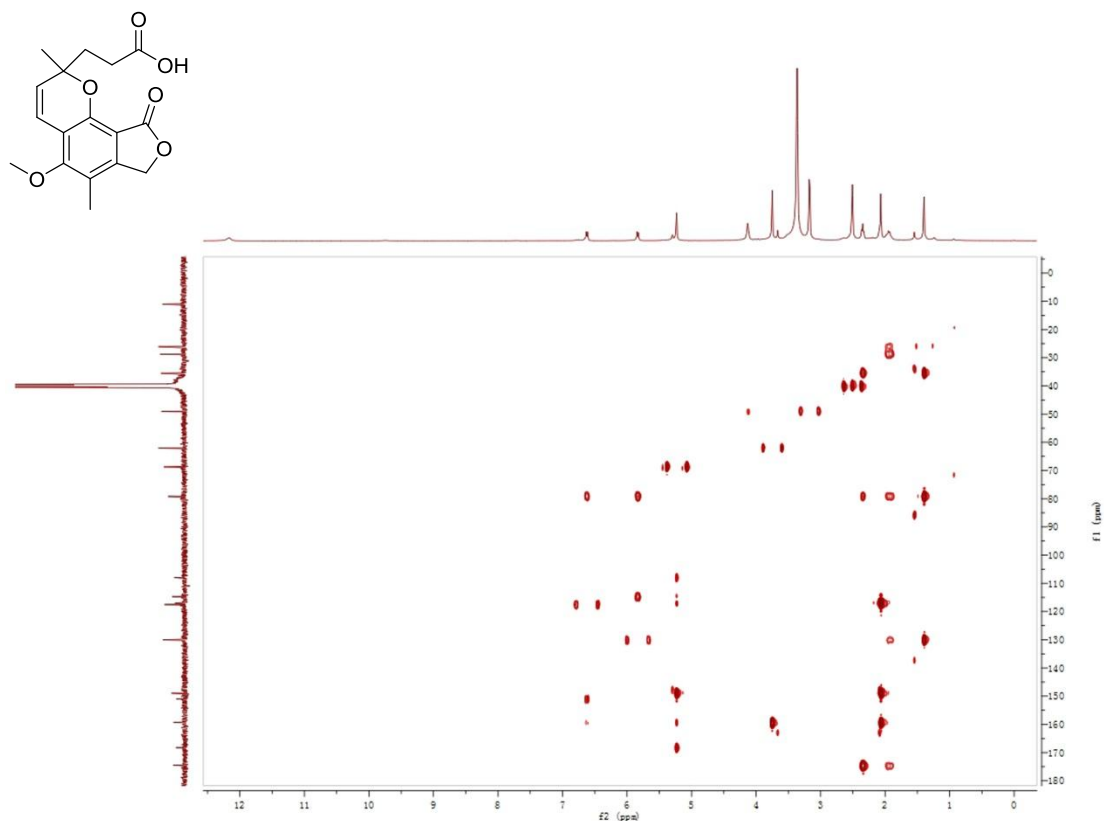

Figure S33. ESIMS spectrum for compound 8

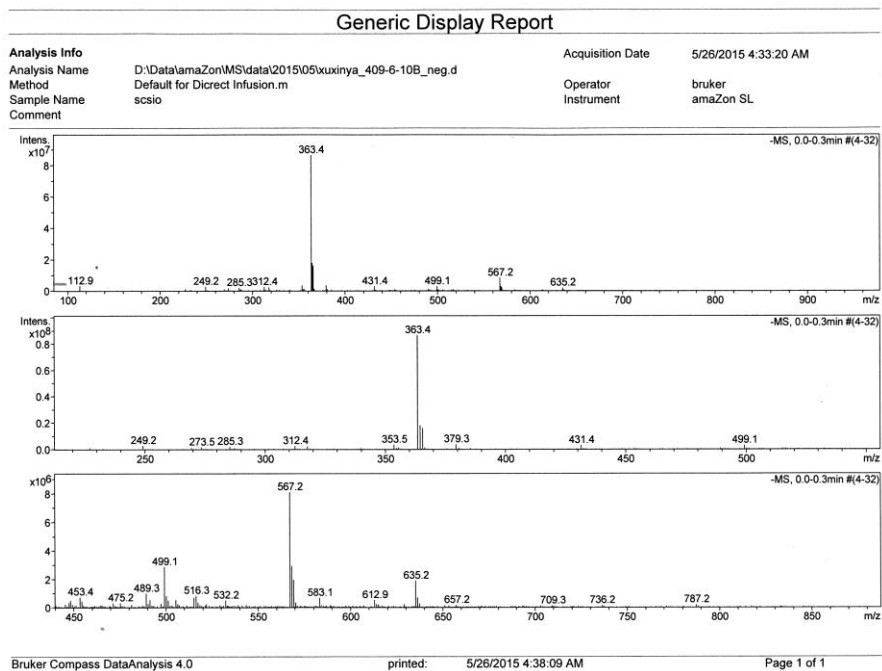

Figure S34.  $^1\text{H}$  NMR spectrum for compound 9

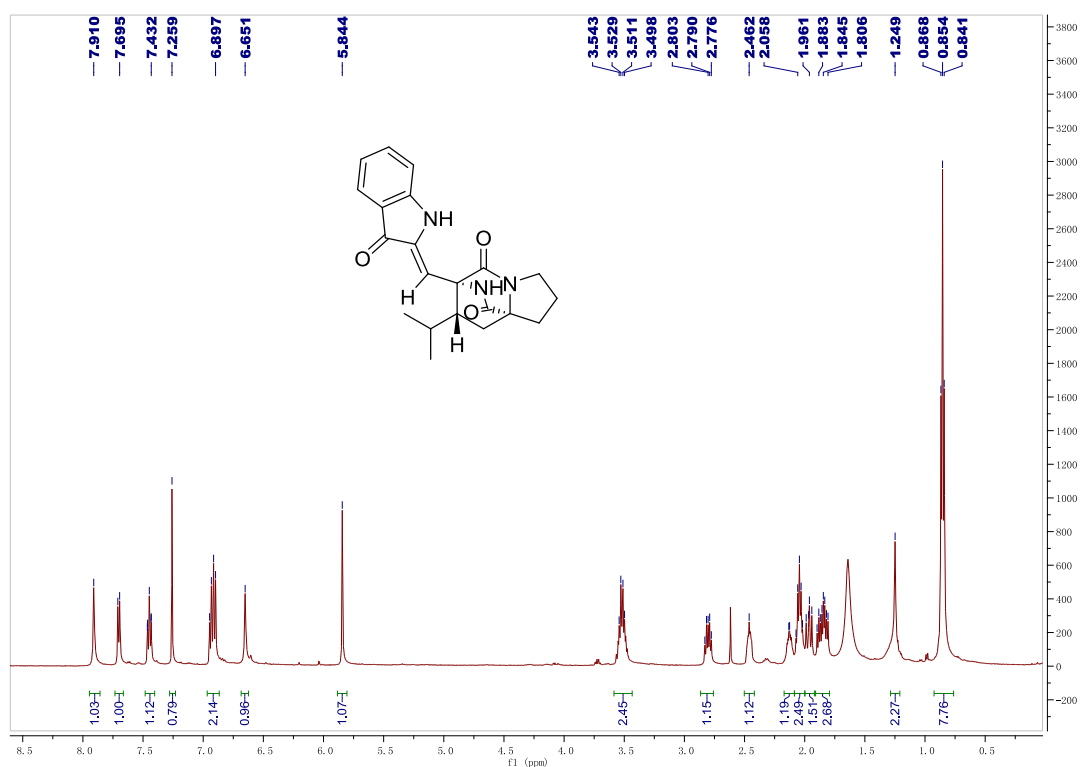

Figure S35.  $^{13}\text{C}$  NMR spectrum for compound **9**

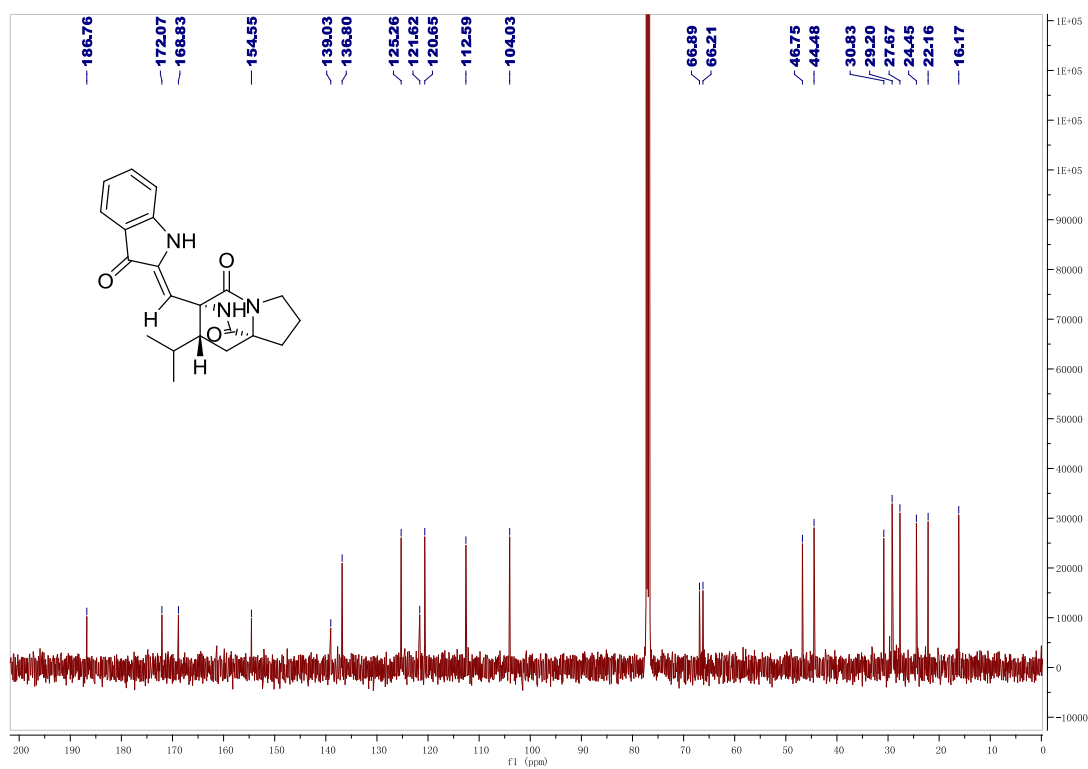

Figure S36. HSQC spectrum for compound **9**

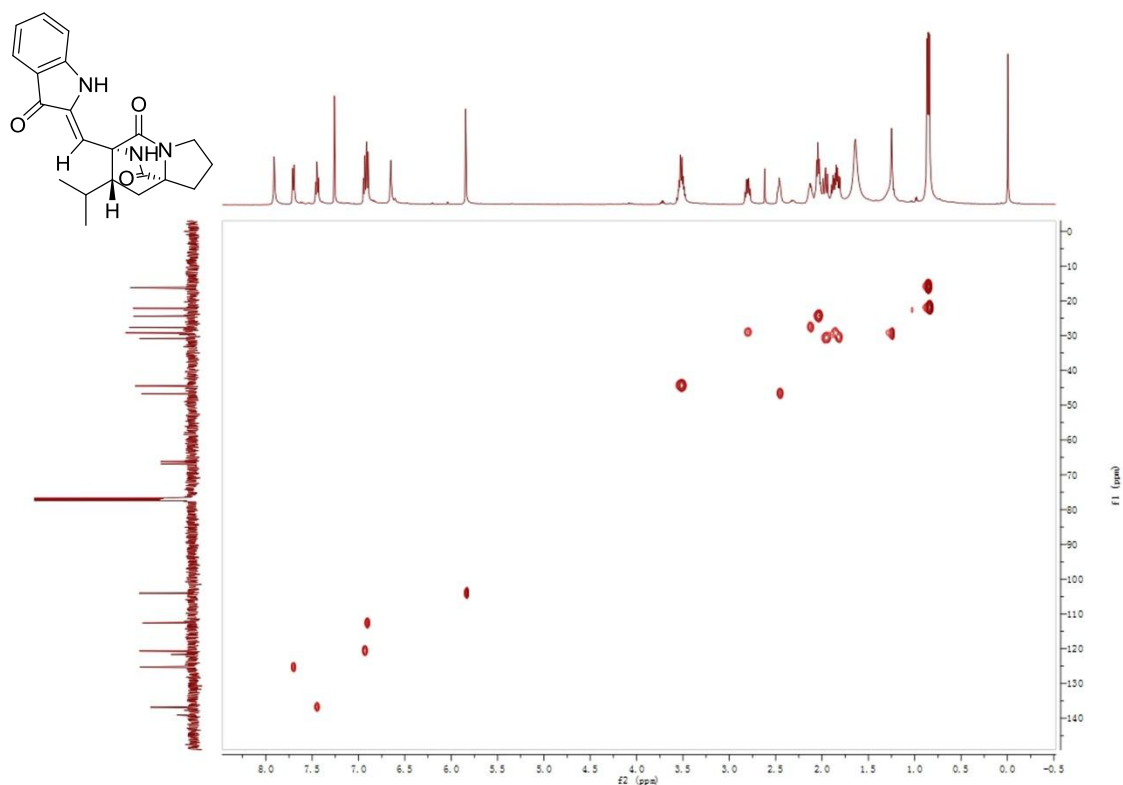

Figure S37.  $^1\text{H}$ - $^1\text{H}$  COSY spectrum for compound **9**

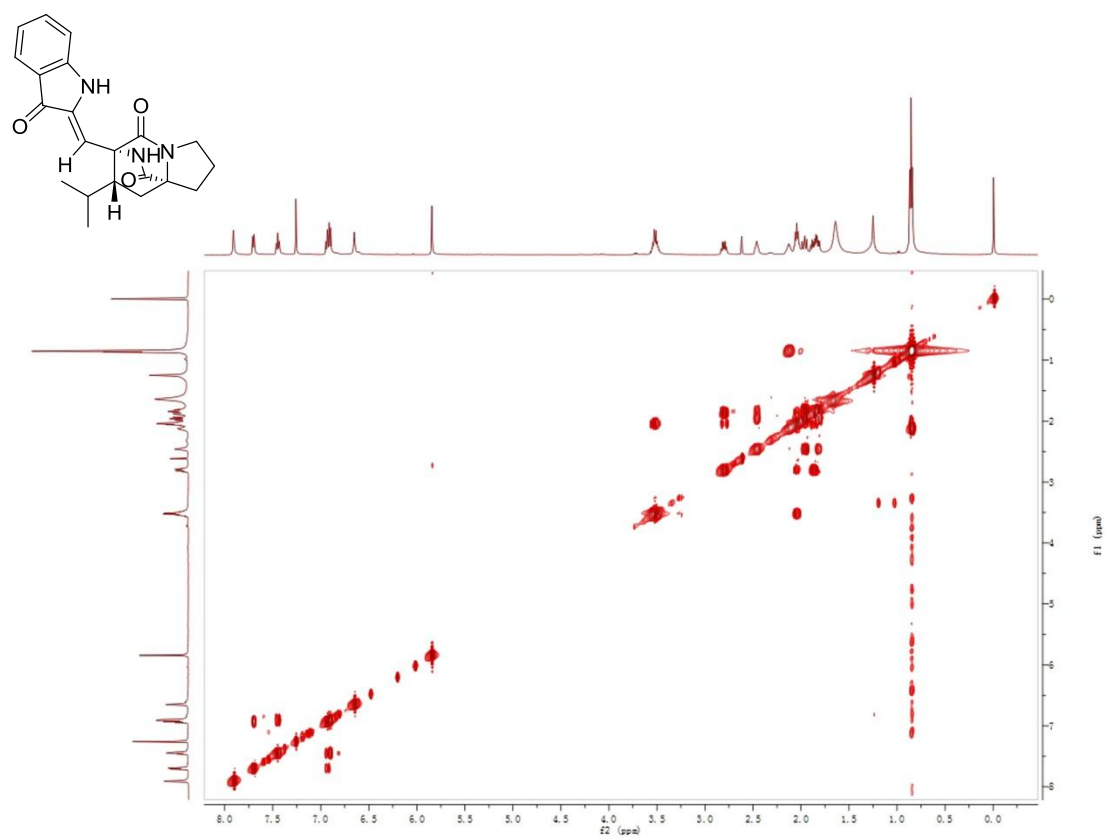

Figure S38. HMBC spectrum for compound **9**

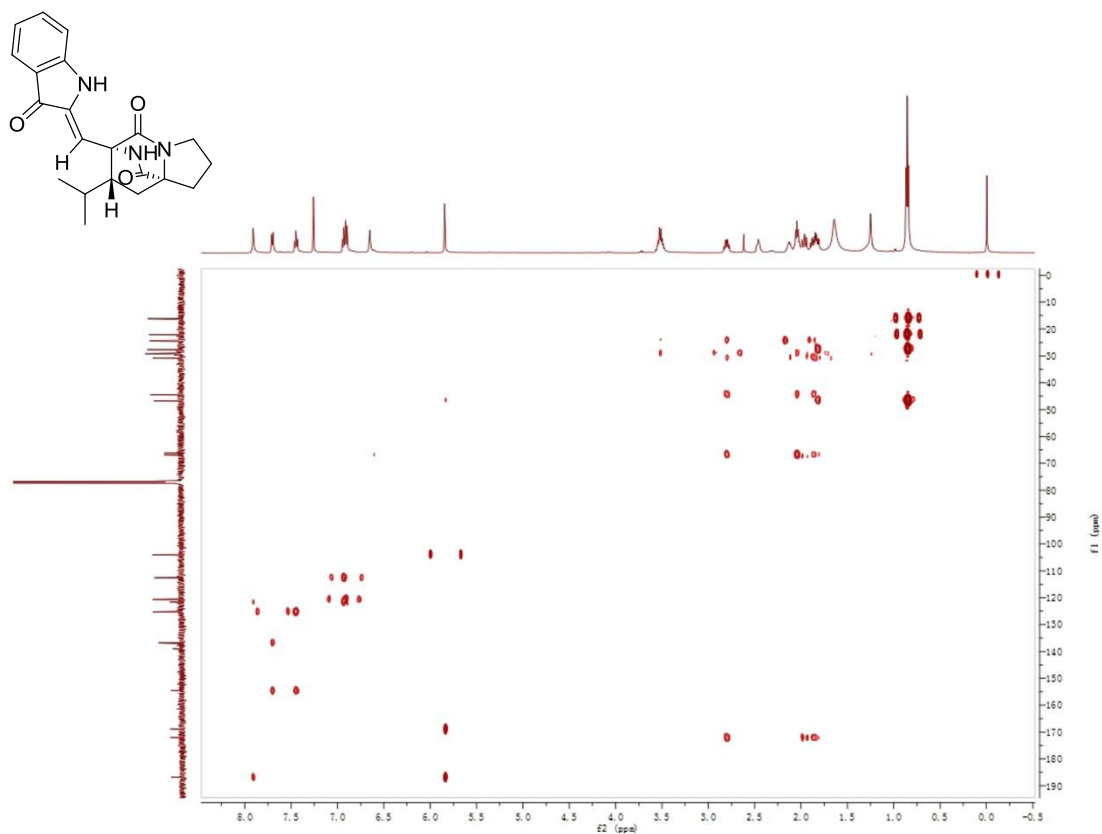

Figure S39. NOESY spectrum for compound **9**

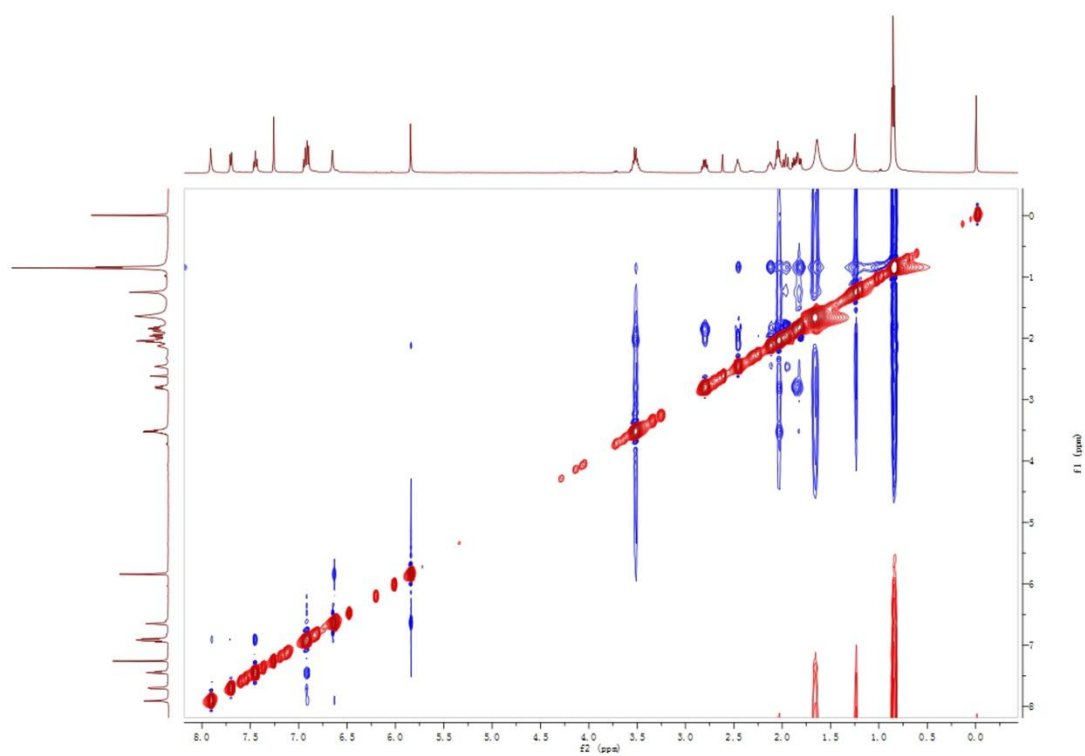

Figure S40. HR-ESIMS spectrum for compound **9**

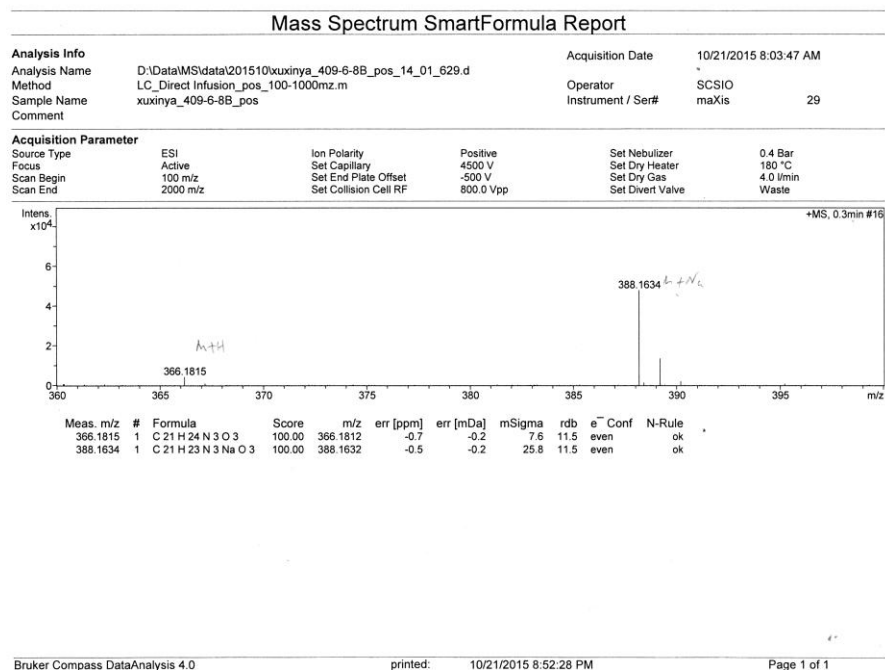

Figure S41. HPLC chromatogram for compounds **3**. HPLC condition: Angilent 1100 HPLC system; Column: Phenomenex<sup>®</sup> SYNERG I, 150 × 4.6 mm; Mobile phase: ACN/water, v/v; Gradient: 0-35 min, 5% to 100% ACN; 35-45 min, 100% ACN; 45-50 min, 100% to 5% ACN; 50-60 min, 5% ACN; Flow rate: 1 mL/min; Detection: 254 nm; Temperature: 25 °C).

```
=====
Injection Date   : 1/26/2017 11:48:34 AM      Seq. Line :    1
Sample Name      : 409-6-4                    Location  : Vial 33
Acq. Operator    : XXY                        Inj       :    1
                                           Inj Volume: 2 µl
                                           Actual Inj Volume: 1 µl
Different Inj Volume from Sequence !
Acq. Method      : C:\HPCHEM\1\METHODS\XUXY~1\XU.M
Last changed     : 1/26/2017 10:31:52 AM by XXY
Analysis Method  : C:\HPCHEM\1\METHODS\AFRA\ANA150X4.6\10-75E.M
Last changed     : 1/26/2017 10:42:08 AM by AFRA
                  (modified after loading)
=====
```

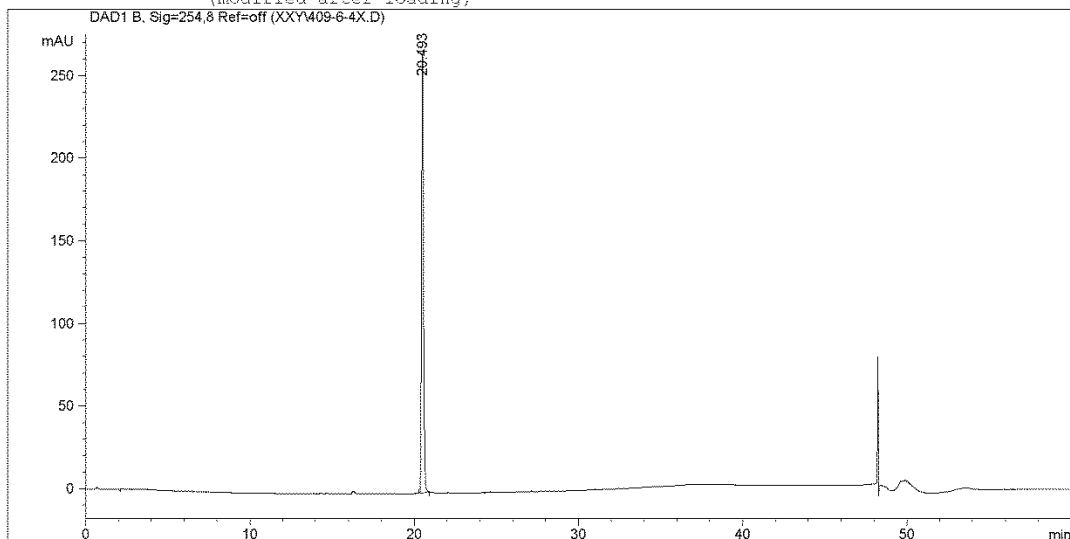

```
=====
                        Area Percent Report
=====
```

```
Sorted By      :      Signal
Multiplier     :      1.0000
Dilution       :      1.0000
Use Multiplier & Dilution Factor with ISTDs
```

Signal 1: DAD1 B, Sig=254,8 Ref=off

| Peak # | RetTime [min] | Type | Width [min] | Area [mAU*s] | Height [mAU] | Area %   |
|--------|---------------|------|-------------|--------------|--------------|----------|
| 1      | 20.493        | BB   | 0.1247      | 2149.82813   | 264.90973    | 100.0000 |

Totals :                      2149.82813   264.90973

Results obtained with enhanced integrator!

```
=====
                        *** End of Report ***
=====
```

Figure S42. HPLC chromatogram for compound **5**. HPLC condition: same with S41.

```
=====
Injection Date   : 1/26/2017 10:34:23 AM      Seq. Line :    1
Sample Name      : 409-6-2                    Location  : Vial 32
Acq. Operator    : XXY                        Inj       :    1
                                           Inj Volume: 2 µl
Acq. Method      : C:\HPCHEM\1\METHODS\XUXY~1\XU.M
Last changed     : 1/26/2017 10:31:52 AM by XXY
Analysis Method  : C:\HPCHEM\1\METHODS\AFRA\ANA150X4.6\10-75E.M
Last changed     : 1/26/2017 10:42:08 AM by AFRA
                  (modified after loading)
=====
```

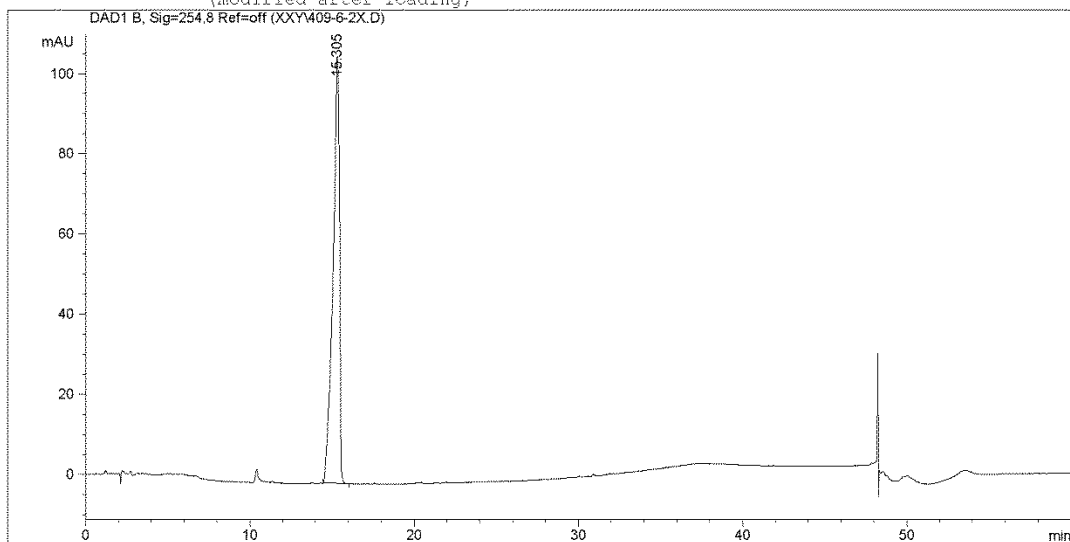

```
=====
                          Area Percent Report
=====
```

```
Sorted By      :      Signal
Multiplier     :      1.0000
Dilution       :      1.0000
Use Multiplier & Dilution Factor with ISTDs
```

Signal 1: DAD1 B, Sig=254.8 Ref=off

| Peak # | RetTime [min] | Type | Width [min] | Area [mAU*s] | Height [mAU] | Area %   |
|--------|---------------|------|-------------|--------------|--------------|----------|
| 1      | 15.305        | BB   | 0.3845      | 2909.28076   | 106.56707    | 100.0000 |

Totals :                      2909.28076   106.56707

Results obtained with enhanced integrator!

```
=====
*** End of Report ***
```

Figure S43. Chiral HPLC chromatogram spectrum for compound **3**. HPLC condition: Angilent 1100 HPLC system; Column: CHIRALPAK<sup>®</sup> IC, 250 × 4.6 mm; Mobile

phase: n-hexane/propan-2-ol 70:30, v/v; Flow rate: 1 mL/min; Detection: 254 nm;  
Temperature: 25 °C.

Data File C:\HPCHEM\1\DATA\XXY\6-4CHIR5.D

Sample Name: 406-6-4

```
=====
Injection Date   : 1/27/2017 1:06:45 AM      Seq. Line :    1
Sample Name      : 406-6-4                  Location  : Vial 32
Acq. Operator    : XXY                      Inj       :    1
                                           Inj Volume: 5 µl
Acq. Method      : C:\HPCHEM\1\METHODS\XU-P.M\XU-P.M
Last changed     : 1/27/2017 1:05:50 AM by XXY
Analysis Method  : C:\HPCHEM\1\METHODS\AFRA\ANA150X4.6\10-75E.M
Last changed     : 1/26/2017 11:12:39 PM by AFRA
                  (modified after loading)
=====
```

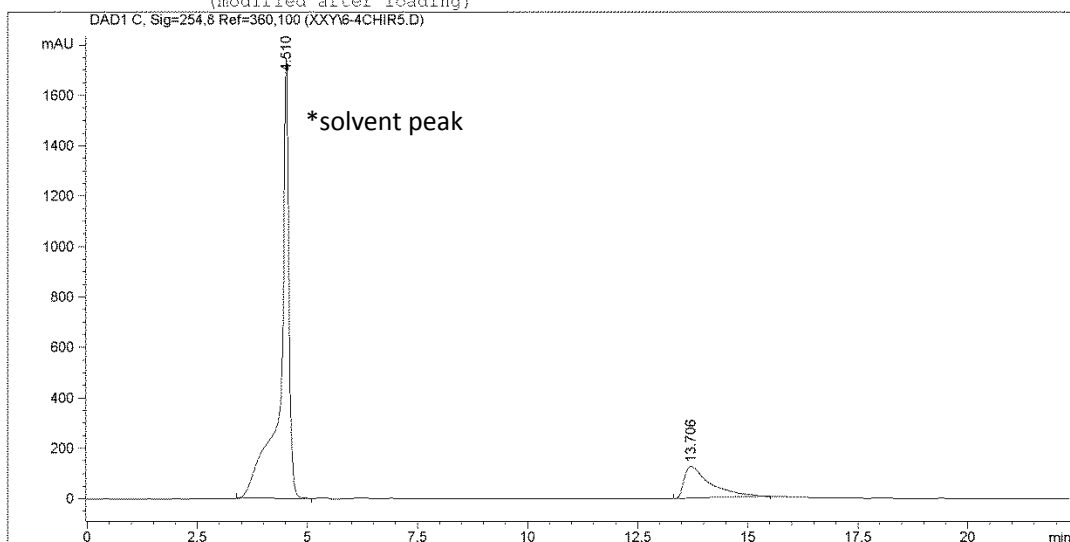

Area Percent Report

```
=====
Sorted By       : Signal
Multiplier      : 1.0000
Dilution        : 1.0000
Use Multiplier & Dilution Factor with ISTDs
=====
```

Signal 1: DAD1 C, Sig=254,8 Ref=360,100

| Peak # | RetTime [min] | Type | Width [min] | Area [mAU*s] | Height [mAU] | Area %  |
|--------|---------------|------|-------------|--------------|--------------|---------|
| 1      | 4.510         | BV   | 0.1842      | 2.37266e4    | 1749.99597   | 81.7529 |
| 2      | 13.706        | PB   | 0.6055      | 5295.71484   | 125.20427    | 18.2471 |

Totals : 2.90223e4 1875.20024

Results obtained with enhanced integrator!

\*\*\* End of Report \*\*\*

Figure S44. Chiral HPLC chromatogram spectrum for compound **6**. HPLC condition: Angilent 1100 HPLC system; Column: CHIRALPAK<sup>®</sup> IC, 250 × 4.6 mm; Mobile

phase: n-hexane/propan-2-ol 60:40, v/v; Flow rate: 1 mL/min; Detection: 254 nm;  
Temperature: 25 °C).

Data File C:\HPCHEM\1\DATA\XXY\4-1CHIR2.D

Sample Name: 409-4-1

```
=====
Injection Date   : 1/27/2017 12:26:17 AM      Seq. Line   :    1
Sample Name      : 409-4-1                    Location      : Vial 34
Acq. Operator    : XXY                        Inj           :    1
                                           Inj Volume    : 5 µl
Different Inj Volume from Sequence !      Actual Inj Volume : 2 µl
Acq. Method      : C:\HPCHEM\1\METHODS\XU-P.M\XU-P.M
Last changed     : 1/26/2017 11:59:52 PM by XXY
Analysis Method  : C:\HPCHEM\1\METHODS\AFRA\ANA150X4.6\10-75E.M
Last changed     : 1/26/2017 11:12:39 PM by AFRA
                  (modified after loading)
=====
```

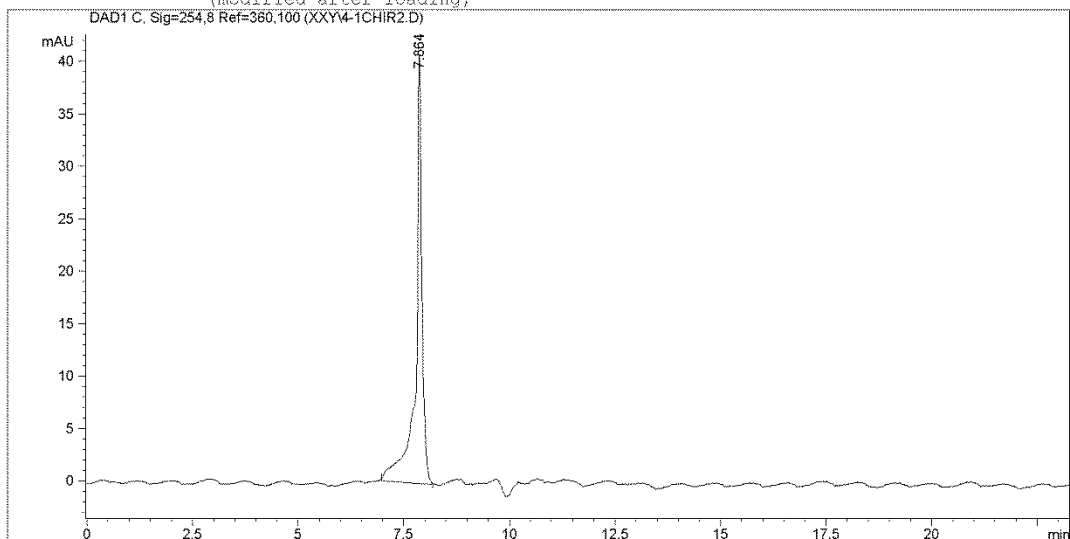

=====  
Area Percent Report  
=====

```
Sorted By      :      Signal
Multiplier     :      1.0000
Dilution       :      1.0000
Use Multiplier & Dilution Factor with ISTDs
```

Signal 1: DAD1 C, Sig=254,8 Ref=360,100

| Peak # | RetTime [min] | Type | Width [min] | Area [mAU*s] | Height [mAU] | Area %   |
|--------|---------------|------|-------------|--------------|--------------|----------|
| 1      | 7.864         | BB   | 0.1342      | 414.31332    | 40.89666     | 100.0000 |

Totals :                      414.31332    40.89666

Results obtained with enhanced integrator!

=====  
\*\*\* End of Report \*\*\*
